# Supplementary material for: Combination immunotherapy with anti-PD-L1 antibody and depletion of regulatory T cells during acute viral infections results in improved virus control but lethal immunopathology
Source: PLoS Pathog. 2020 Mar 30;16(3):e1008340. doi: 10.1371/journal.ppat.1008340 (PMC7105110; doi:10.1371/journal.ppat.1008340)
Supplement: S2 Table — Mice were infected with FV and were treated with DT and blocking antibodies against PD-L1 and TIM-3 as indicated (Fig 1A). At 18 days post infection CD3+CD8+CD43+ T cells and CD3+CD4+CD43+CD62L- T cells were sorted from the spleens of FV-infected DEREG mice and from infected DEREG mice treated with DT plus anti-PD-L1/Tim-3 antibodies. Cells were lysed and subjected to proteome analysis performed by label-free quantification using liquid chromatography and tandem mass spectrometry (LC-MS/MS). Differently expressed proteins were analyzed with the Gene Ontology enrichment tool (GO analysis). (XLSX) [file ppat.1008340.s006.xlsx]

## Sheet: CD4_up in FV inf._GO annotation
Category	Term	Count	%	PValue	Genes	List Total	Pop Hits	Pop Total	Fold Enrichment	Bonferroni	Benjamini	FDR
GOTERM_CC_DIRECT	GO:0070062~extracellular exosome	70	44.3038	4.00983e-21	P54071, Q91VM9, P11031, Q922Q1, Q9CQI6, Q7TSV4, P61358, P47791, P0C0S6, Q62426, Q91Z53, P61079, Q791V5, P28063, Q8QZT1, Q9D0F9, P17225, Q921M7, P43274, Q9QYJ3, Q8CGP6, P61971, Q91V64, P97372, P68037, P19157, Q9CS42, P20108, P97371, Q9Z0P5, P16125, Q8BFR5, P99027, P62962, Q9D2G2, Q99LB6, P99029, P62317, P01942, P45376, Q78IK2, Q8BWT1, Q9CXW4, P28474, Q9Z2I9, P27048, Q8R0J7, Q62093, Q6P069, P13020,…	156	2674	19662	3.29944	9.34291e-19	9.34291e-19	5.15141e-18
GOTERM_CC_DIRECT	GO:0005739~mitochondrion	53	33.5443	2.95987e-18	Q9D0K2, P54071, P51174, Q91VM9, Q922Q1, Q9D172, P47791, P56391, Q8BH59, Q99KE1, Q791V5, Q8QZT1, P62897, Q99M87, Q91V61, P19157, Q9Z2I8, P20108, P54822, Q9JHI5, P16125, Q8BFR5, Q9D2G2, Q99LB6, O55125, P99029, Q9DCT2, Q61102, Q78IK2, Q80Y14, Q8BWT1, P28474, Q9Z2I9, Q9DAR7, Q6P069, Q8BIJ6, P14152, O08709, P63101, P08249, P00405, P11352, O08756, Q9D0L7, Q61425, Q9Z2D6, P70296, Q80XN0, P28352, Q9JM14,…	156	1721	19662	3.88149	6.89649e-16	3.44824e-16	3.80252e-15
GOTERM_CC_DIRECT	GO:0043209~myelin sheath	17	10.7595	2.64972e-12	P20108, P13020, P16125, Q8BH59, P14152, Q8BFR5, P70296, P02088, P08249, Q9D2G2, P53810, P62897, P01942, P51881, Q9DCT2, Q9Z2I9, P35486	156	192	19662	11.1597	6.17396e-10	2.05799e-10	3.40414e-09
GOTERM_MF_DIRECT	GO:0044822~poly(A) RNA binding	37	23.4177	3.45503e-12	P11031, Q62093, P61358, Q62426, P35550, P63101, Q8BV49, P08249, P59325, P17225, Q8K224, P43274, P62806, P24527, P68037, Q9ESX5, O08756, Q8BVY0, Q9Z0P5, Q9CWX9, Q6ZWM4, Q9Z2D6, Q9D6Z1, Q8BFR5, P70296, P62962, Q6DFW4, P62317, P28352, O08784, P51881, D0QMC3, Q8BWT1, P27048, Q9CXW4, Q9D0T1, O35295	152	1113	17446	3.81556	1.344e-09	1.344e-09	4.79952e-09
GOTERM_MF_DIRECT	GO:0016491~oxidoreductase activity	27	17.0886	1.21894e-11	P54071, P51174, Q922Q1, P47791, Q91Z53, P48758, Q99KE1, P14152, O08709, P08249, P00405, P11352, O08756, P20108, Q8VC28, Q61425, Q5M8N4, Q9JHI5, O88712, P16125, Q80XN0, P99029, P28352, Q9DCT2, P45376, P28474, P35486	152	604	17446	5.13073	4.74166e-09	2.37083e-09	1.69328e-08
GOTERM_CC_DIRECT	GO:0005634~nucleus	88	55.6962	3.45735e-11	P11031, Q9CQI6, P63158, P61358, P0C0S6, Q62426, Q8BMS9, Q791V5, P28063, P52332, P17225, P62897, P43274, Q99M87, Q9QYJ3, P43275, Q8CGP6, P68037, P19157, Q8BVY0, Q9Z2I8, Q9CWX9, Q91VJ5, Q8BVK9, Q921I9, P62962, Q6DFW4, P54726, Q9D2G2, Q99LB6, P99029, Q61160, P62317, P62915, Q9DCT2, O08784, Q3TEA8, Q80Y14, P61965, P28474, Q9CXW4, P27048, O35295, Q60953, Q9DAR7, Q62093, Q9CQT1, P13020, Q9QZQ8, P48758,…	156	6019	19662	1.84273	8.05562e-09	2.0139e-09	4.44163e-08
GOTERM_BP_DIRECT	GO:0055114~oxidation-reduction process	27	17.0886	5.75705e-11	P54071, P51174, Q922Q1, P47791, Q91Z53, P48758, Q99KE1, P14152, O08709, P08249, P00405, P62897, P11352, O08756, P20108, Q8VC28, Q61425, Q5M8N4, Q9JHI5, O88712, P16125, Q80XN0, P99029, Q9DCT2, P45376, P28474, P35486	151	676	18082	4.78285	5.67069e-08	5.67069e-08	9.07845e-08
GOTERM_CC_DIRECT	GO:0005759~mitochondrial matrix	14	8.86076	3.21691e-09	Q9D0K2, P51174, Q61425, Q8BIJ6, Q9JHI5, Q99KE1, P08249, Q80XN0, Q8QZT1, Q99LX0, Q99M87, Q80Y14, Q8BWT1, P35486	156	188	19662	9.38584	7.49541e-07	1.49908e-07	4.13275e-06
GOTERM_CC_DIRECT	GO:0005730~nucleolus	26	16.4557	1.04645e-08	P11031, Q60953, Q9CQT1, Q9QZQ8, Q62426, Q6PGL7, P35550, Q8BV49, P43274, Q8K224, Q9QYJ3, Q9ESX5, Q8BVY0, Q9CWX9, Q9CRA8, Q8BVK9, Q9D6Z1, Q921I9, Q64511, Q6DFW4, P28352, P62915, O08784, D0QMC3, Q9CXW4, Q9D0T1	156	842	19662	3.89192	2.43823e-06	4.06373e-07	1.34437e-05
GOTERM_CC_DIRECT	GO:0005743~mitochondrial inner membrane	18	11.3924	1.15374e-08	P54071, O08756, Q922Q1, Q61425, P56391, Q8BH59, Q791V5, Q8BFR5, P08249, Q8QZT1, O55125, Q80XN0, P00405, P51881, Q9DCT2, Q78IK2, Q61102, Q8BWT1	156	387	19662	5.86225	2.68822e-06	3.84032e-07	1.48221e-05
GOTERM_CC_DIRECT	GO:0005829~cytosol	38	24.0506	3.32954e-08	P54071, Q60953, Q7TSV4, P47791, Q6P069, P13020, Q8BIJ6, Q91Z53, Q6PGL7, P14152, O08709, Q6Q899, P28063, P63101, P52332, P53810, P62897, Q99M87, P11352, Q9QYJ3, P61971, P19157, P20108, P54822, Q9Z2D6, Q5DU31, Q93092, P62962, P03958, Q64511, Q61160, P99029, P62317, Q99LX0, P45376, Q99KK2, O88673, P27048	156	1784	19662	2.68468	7.7578e-06	9.69728e-07	4.27744e-05
GOTERM_BP_DIRECT	GO:0006099~tricarboxylic acid cycle	7	4.43038	1.1962e-07	P54071, Q9D2G2, P08249, Q9Z2I8, Q9Z2I9, P35486, P14152	151	29	18082	28.9048	0.000117819	5.8911e-05	0.000188632
GOTERM_BP_DIRECT	GO:0008152~metabolic process	17	10.7595	1.55502e-06	P19157, Q9D0K2, P51174, Q9Z2I8, Q91Z53, Q9JHI5, O88712, Q99KE1, O08709, Q9D2G2, Q8QZT1, Q80XN0, Q60710, Q8BWT1, Q9Z2I9, P35486, Q91V64	151	463	18082	4.39681	0.00153053	0.000510436	0.00245213
GOTERM_MF_DIRECT	GO:0003824~catalytic activity	17	10.7595	4.13991e-06	Q922Q1, Q9DAR7, Q9Z2I8, P54822, Q5M8N4, P16125, P14152, Q99KE1, O08709, Q93092, P08249, Q8QZT1, Q80XN0, Q60710, Q8BWT1, Q9Z2I9, Q91V64	152	479	17446	4.07348	0.00160913	0.000536665	0.00575078
GOTERM_MF_DIRECT	GO:0004601~peroxidase activity	6	3.79747	6.44069e-06	O08709, P02088, P20108, P99029, P01942, P11352	152	31	17446	22.2148	0.0025023	0.000626163	0.00894667
GOTERM_CC_DIRECT	GO:0005737~cytoplasm	80	50.6329	6.70413e-06	Q91VM9, Q9CQI6, Q7TSV4, P63158, P47791, Q62426, Q91Z53, Q6PGL7, Q8BMS9, P28063, P52332, P59325, Q9D0F9, P17225, Q99M87, Q9QYJ3, P97372, Q91V64, P68037, P19157, P20108, P97371, Q9Z0P5, Q91VJ5, P16125, Q921I9, P62962, Q6DFW4, Q9QYB5, P99029, Q61160, P62317, O08784, P45376, P28474, Q9CXW4, P27048, Q8R0J7, Q60953, Q9DAR7, Q8K4G5, Q9CQT1, Q6P069, P13020, Q8BIJ6, P48758, P14152, O08709, Q8QZV7, Q6Q899,…	156	6631	19662	1.5206	0.00156085	0.000173548	0.00861242
GOTERM_MF_DIRECT	GO:0016616~oxidoreductase activity, acting on the CH-OH group of donors, NAD or NADP as acceptor	6	3.79747	7.58037e-06	P54071, P08249, O88712, Q91Z53, P16125, P14152	152	32	17446	21.5206	0.00294443	0.000589581	0.0105297
GOTERM_MF_DIRECT	GO:0051287~NAD binding	7	4.43038	7.77694e-06	O08756, P54071, O88712, Q91Z53, P16125, Q99KE1, P14152	152	55	17446	14.6079	0.00302067	0.00050408	0.0108028
GOTERM_BP_DIRECT	GO:0045454~cell redox homeostasis	7	4.43038	1.62695e-05	O08709, P20108, P99029, P28352, P47791, P11352, Q80Y14	151	65	18082	12.896	0.0158979	0.00399839	0.0256528
GOTERM_CC_DIRECT	GO:0031428~box C/D snoRNP complex	4	2.53165	1.64323e-05	Q6DFW4, P35550, Q9D6Z1, Q9D0T1	156	7	19662	72.022	0.00382143	0.000382802	0.0211084
GOTERM_BP_DIRECT	GO:0000154~rRNA modification	4	2.53165	1.91126e-05	Q9ESX5, Q6DFW4, Q8K224, Q9D6Z1	151	7	18082	68.4276	0.01865	0.00375814	0.0301349
GOTERM_MF_DIRECT	GO:0051920~peroxiredoxin activity	4	2.53165	7.29521e-05	O08709, P20108, P99029, Q99LX0	152	10	17446	45.9105	0.0279805	0.00404599	0.101293
GOTERM_MF_DIRECT	GO:0098641~cadherin binding involved in cell-cell adhesion	11	6.96203	0.000161079	O08709, P62962, Q8BVY0, P63101, P59325, Q9WV55, Q99LX0, Q9Z0P5, Q9QYJ3, Q9D6Z1, O70400	152	279	17446	4.52523	0.0607415	0.00780247	0.223529
GOTERM_BP_DIRECT	GO:0042744~hydrogen peroxide catabolic process	4	2.53165	0.000190461	O08709, P20108, P99029, P11352	151	14	18082	34.2138	0.171072	0.0307864	0.29992
GOTERM_CC_DIRECT	GO:0005913~cell-cell adherens junction	11	6.96203	0.000209802	O08709, P62962, Q8BVY0, P63101, P59325, Q9WV55, Q99LX0, Q9Z0P5, Q9QYJ3, Q9D6Z1, O70400	156	316	19662	4.38741	0.0477132	0.00443459	0.269197
GOTERM_CC_DIRECT	GO:0000786~nucleosome	7	4.43038	0.000215049	P43274, P43275, Q3TEA8, Q8CGP6, Q9QZQ8, P62806, P0C0S6	156	108	19662	8.16916	0.0488769	0.00416728	0.275921
GOTERM_MF_DIRECT	GO:0031490~chromatin DNA binding	6	3.79747	0.000247183	P28352, P43274, P43275, Q9Z2D6, Q9QZQ8, P0C0S6	152	65	17446	10.5947	0.0916868	0.0106282	0.342826
GOTERM_CC_DIRECT	GO:0005694~chromosome	11	6.96203	0.000411504	Q64511, P35550, P63158, Q61550, P43274, P43275, Q3TEA8, Q8CGP6, Q9QZQ8, P0C0S6, Q8BMS9	156	344	19662	4.0303	0.0914453	0.0073498	0.52737
GOTERM_BP_DIRECT	GO:0006364~rRNA processing	7	4.43038	0.000641223	Q9ESX5, P35550, Q9CRA8, Q9CWX9, Q8K224, Q9CXW4, Q921I9	151	126	18082	6.65269	0.46837	0.0863048	1.00639
GOTERM_CC_DIRECT	GO:0046540~U4/U6 x U5 tri-snRNP complex	4	2.53165	0.00086116	P62317, Q6ZWM4, P27048, Q9D0T1	156	24	19662	21.0064	0.181872	0.014236	1.1007
GOTERM_CC_DIRECT	GO:0030529~intracellular ribonucleoprotein complex	10	6.32911	0.00100915	Q9ESX5, P99027, Q6DFW4, P35550, P62317, P61358, Q6ZWM4, Q9CXW4, P27048, Q9D6Z1	156	320	19662	3.9387	0.209627	0.015561	1.28872
GOTERM_MF_DIRECT	GO:0003723~RNA binding	17	10.7595	0.00120178	Q9ESX5, Q8BVY0, Q62093, Q9CWX9, Q9CRA8, Q6ZWM4, Q921I9, Q6Q899, P35550, P17225, P28352, Q60710, Q99LX0, P27048, Q9CXW4, Q9D0T1, O35295	152	780	17446	2.50154	0.373604	0.0457	1.65657
GOTERM_BP_DIRECT	GO:0005975~carbohydrate metabolic process	8	5.06329	0.00167553	Q93092, P08249, Q7TSV4, Q9D0F9, P16125, P35486, P14152, Q8VDL4	151	206	18082	4.65042	0.808292	0.186552	2.60975
GOTERM_BP_DIRECT	GO:0006108~malate metabolic process	3	1.89873	0.00185238	P08249, Q99KE1, P14152	151	8	18082	44.9056	0.83899	0.183657	2.88145
GOTERM_CC_DIRECT	GO:0032040~small-subunit processome	4	2.53165	0.00283498	Q6DFW4, P35550, Q9D6Z1, Q9D0T1	156	36	19662	14.0043	0.483917	0.0405	3.58154
GOTERM_BP_DIRECT	GO:0008380~RNA splicing	8	5.06329	0.00402197	Q9DAR7, P62317, Q62093, P17225, Q9CWX9, Q91VJ5, Q6ZWM4, P27048	151	241	18082	3.97505	0.98112	0.327641	6.15742
GOTERM_BP_DIRECT	GO:0042989~sequestering of actin monomers	3	1.89873	0.00427225	P62962, Q9Z0P5, P13020	151	12	18082	29.9371	0.98526	0.318446	6.52859
GOTERM_BP_DIRECT	GO:0006734~NADH metabolic process	3	1.89873	0.00427225	Q9D2G2, P08249, P14152	151	12	18082	29.9371	0.98526	0.318446	6.52859
GOTERM_BP_DIRECT	GO:0098609~cell-cell adhesion	7	4.43038	0.00499066	O08709, P63101, P59325, Q9WV55, Q9Z0P5, Q9QYJ3, O70400	151	189	18082	4.43512	0.99276	0.336798	7.58641
GOTERM_BP_DIRECT	GO:0051016~barbed-end actin filament capping	3	1.89873	0.00760079	Q9Z0P5, P70429, P13020	151	16	18082	22.4528	0.999455	0.43904	11.3361
GOTERM_CC_DIRECT	GO:0005732~small nucleolar ribonucleoprotein complex	3	1.89873	0.00776996	Q9ESX5, Q6DFW4, Q9D6Z1	156	17	19662	22.2421	0.837564	0.101393	9.53526
GOTERM_BP_DIRECT	GO:0061136~regulation of proteasomal protein catabolic process	3	1.89873	0.00856765	P97371, P11352, P97372	151	17	18082	21.1321	0.999791	0.45414	12.6885
GOTERM_CC_DIRECT	GO:0005654~nucleoplasm	26	16.4557	0.00923466	Q60953, Q9DAR7, Q6P069, P35550, P08249, Q60710, P61971, P62806, P24527, Q9ESX5, Q61425, Q91VJ5, O88712, Q9JHI5, Q9CSU0, Q9D6Z1, Q9ERU3, Q64511, Q9QYB5, Q80XN0, P28352, Q61550, P45376, P61965, Q9CXW4, Q924K8	156	1935	19662	1.69354	0.884868	0.113162	11.2359
GOTERM_BP_DIRECT	GO:0019752~carboxylic acid metabolic process	3	1.89873	0.00958652	P08249, P16125, P14152	151	18	18082	19.9581	0.999924	0.468765	14.0927
GOTERM_BP_DIRECT	GO:0040029~regulation of gene expression, epigenetic	3	1.89873	0.00958652	P11352, Q9Z2D6, Q9QZQ8	151	18	18082	19.9581	0.999924	0.468765	14.0927
GOTERM_MF_DIRECT	GO:0009055~electron carrier activity	4	2.53165	0.0108555	P51174, P62897, Q80Y14, Q9JHI5	152	53	17446	8.66236	0.985677	0.320223	14.0688
GOTERM_BP_DIRECT	GO:0006334~nucleosome assembly	5	3.16456	0.0110266	P43274, P43275, Q3TEA8, Q9QZQ8, P62806	151	104	18082	5.75713	0.999982	0.494696	16.0415
GOTERM_CC_DIRECT	GO:0005697~telomerase holoenzyme complex	3	1.89873	0.0117532	Q9ESX5, Q8K224, P27048	156	21	19662	18.0055	0.936373	0.134965	14.0914
GOTERM_BP_DIRECT	GO:0042542~response to hydrogen peroxide	4	2.53165	0.0123763	P03958, P20108, Q99LX0, P11352	151	58	18082	8.25851	0.999995	0.514012	17.8303
GOTERM_CC_DIRECT	GO:0005925~focal adhesion	9	5.6962	0.0124994	P62962, P99027, P63101, P52332, P61358, Q7TPR4, P70429, P13020, O70400	156	391	19662	2.90114	0.946641	0.136305	14.921
GOTERM_MF_DIRECT	GO:0005080~protein kinase C binding	4	2.53165	0.0126066	Q64511, Q9QYB5, Q62093, Q9Z0P5	152	56	17446	8.19831	0.992811	0.337187	16.1581
GOTERM_MF_DIRECT	GO:0004602~glutathione peroxidase activity	3	1.89873	0.0127665	O08709, P19157, P11352	152	20	17446	17.2164	0.993249	0.31919	16.3465
GOTERM_BP_DIRECT	GO:0051607~defense response to virus	6	3.79747	0.0128105	Q6Q899, Q60953, Q61160, Q60710, Q9CRA8, Q921I9	151	167	18082	4.30234	0.999997	0.506162	18.3981
GOTERM_BP_DIRECT	GO:0000302~response to reactive oxygen species	3	1.89873	0.0129461	O08709, P19157, P11352	151	21	18082	17.1069	0.999997	0.491116	18.5746
GOTERM_MF_DIRECT	GO:0019904~protein domain specific binding	8	5.06329	0.0130164	P63101, Q9WV55, Q7TPR4, Q9Z2D6, P13020, O88712, P62806, Q5DU31	152	289	17446	3.1772	0.993883	0.30514	16.6402
GOTERM_CC_DIRECT	GO:0000502~proteasome complex	4	2.53165	0.0153064	P54726, P28063, P97371, P97372	156	66	19662	7.63869	0.972511	0.157297	17.9762
GOTERM_BP_DIRECT	GO:0006342~chromatin silencing	4	2.53165	0.0154586	Q9Z2D6, Q8CGP6, Q9QZQ8, P0C0S6	151	63	18082	7.60307	1	0.535727	21.7823
GOTERM_BP_DIRECT	GO:0034614~cellular response to reactive oxygen species	3	1.89873	0.0167414	P20108, P99029, Q99LX0	151	24	18082	14.9685	1	0.547016	23.3741
GOTERM_MF_DIRECT	GO:0016853~isomerase activity	5	3.16456	0.0177826	Q9ESX5, Q64511, Q7TSV4, Q9D0F9, Q9CQT1	152	115	17446	4.99027	0.999069	0.37206	22.0614
GOTERM_BP_DIRECT	GO:0006397~mRNA processing	8	5.06329	0.0180473	Q9DAR7, P62317, Q62093, P17225, Q9CWX9, Q91VJ5, Q6ZWM4, P27048	151	322	18082	2.97511	1	0.557541	24.9633
GOTERM_BP_DIRECT	GO:0032757~positive regulation of interleukin-8 production	3	1.89873	0.0180993	Q6Q899, Q61160, Q99LX0	151	25	18082	14.3698	1	0.542612	25.0259
GOTERM_MF_DIRECT	GO:0016209~antioxidant activity	3	1.89873	0.0181317	O08709, P20108, P99029	152	24	17446	14.347	0.99919	0.359094	22.4453
GOTERM_MF_DIRECT	GO:0019899~enzyme binding	9	5.6962	0.0187428	P70296, Q64511, Q99LB6, Q9CQI6, Q8QZT1, Q9Z0J0, Q99LX0, Q9Z2D6, Q9QZQ8	152	384	17446	2.69007	0.999364	0.351406	23.1131
GOTERM_MF_DIRECT	GO:0003713~transcription coactivator activity	6	3.79747	0.0202482	P68037, Q60953, P11031, P28352, Q99LX0, O70400	152	180	17446	3.82588	0.99965	0.3573	24.7356
GOTERM_BP_DIRECT	GO:0006915~apoptotic process	11	6.96203	0.0205994	Q60953, Q61160, P62897, Q61550, Q9CWX9, Q99M87, P11352, Q8BVK9, P13020, P61079, O35295	151	570	18082	2.31093	1	0.574403	27.9802
GOTERM_CC_DIRECT	GO:0072562~blood microparticle	5	3.16456	0.0211474	P62962, P02088, P63101, P01942, P13020	156	133	19662	4.73829	0.993127	0.202579	24.0119
GOTERM_BP_DIRECT	GO:0051289~protein homotetramerization	4	2.53165	0.0236324	O08756, P51174, Q60710, P70429	151	74	18082	6.47288	1	0.610268	31.418
GOTERM_BP_DIRECT	GO:0046061~dATP catabolic process	2	1.26582	0.0246821	P03958, Q60710	151	3	18082	79.8322	1	0.612021	32.5715
GOTERM_BP_DIRECT	GO:0044249~cellular biosynthetic process	2	1.26582	0.0246821	Q9CS42, Q9CQT1	151	3	18082	79.8322	1	0.612021	32.5715
GOTERM_BP_DIRECT	GO:0006979~response to oxidative stress	5	3.16456	0.0248882	P70296, P20108, P99029, Q99LX0, P11352	151	133	18082	4.50182	1	0.601262	32.7959
GOTERM_MF_DIRECT	GO:0030060~L-malate dehydrogenase activity	2	1.26582	0.0257432	P08249, P14152	152	3	17446	76.5175	0.999961	0.413722	30.3922
GOTERM_CC_DIRECT	GO:0043234~protein complex	11	6.96203	0.0272849	Q9CS42, P19157, P63101, Q61160, Q9Z2I8, Q8R574, Q9Z2D6, P13020, P62806, Q9D0T1, Q8BMS9	156	628	19662	2.20768	0.998413	0.244405	29.9106
GOTERM_MF_DIRECT	GO:0003779~actin binding	8	5.06329	0.0278909	P62962, Q9QYB5, Q9CQI6, Q8K4G5, Q9Z0P5, Q7TPR4, P70429, P13020	152	338	17446	2.7166	0.999983	0.423158	32.4938
GOTERM_MF_DIRECT	GO:0008134~transcription factor binding	8	5.06329	0.0294689	Q8BV49, P63101, P62915, Q99LX0, Q9Z2D6, D0QMC3, O88712, O35295	152	342	17446	2.68483	0.999991	0.4254	34.0002
GOTERM_MF_DIRECT	GO:0003690~double-stranded DNA binding	5	3.16456	0.0305678	Q6Q899, Q8BV49, P63158, D0QMC3, O35295	152	136	17446	4.21972	0.999994	0.422431	35.0308
GOTERM_MF_DIRECT	GO:0070491~repressing transcription factor binding	3	1.89873	0.0311542	Q99LX0, Q6P069, O88712	152	32	17446	10.7603	0.999996	0.414504	35.5746
GOTERM_CC_DIRECT	GO:0008537~proteasome activator complex	2	1.26582	0.0311643	P97371, P97372	156	4	19662	63.0192	0.999374	0.26462	33.4181
GOTERM_CC_DIRECT	GO:0002189~ribose phosphate diphosphokinase complex	2	1.26582	0.0311643	Q9CS42, Q8R574	156	4	19662	63.0192	0.999374	0.26462	33.4181
GOTERM_MF_DIRECT	GO:0000287~magnesium ion binding	6	3.79747	0.0313804	Q9CS42, P54071, Q91VM9, Q7TSV4, Q8R574, Q9D0F9	152	202	17446	3.4092	0.999996	0.403559	35.7832
GOTERM_BP_DIRECT	GO:0046952~ketone body catabolic process	2	1.26582	0.0327742	Q9D0K2, Q8QZT1	151	4	18082	59.8742	1	0.690336	40.8731
GOTERM_BP_DIRECT	GO:0031125~rRNA 3'-end processing	2	1.26582	0.0327742	Q9CRA8, Q921I9	151	4	18082	59.8742	1	0.690336	40.8731
GOTERM_BP_DIRECT	GO:0019884~antigen processing and presentation of exogenous antigen	2	1.26582	0.0327742	P97371, P97372	151	4	18082	59.8742	1	0.690336	40.8731
GOTERM_BP_DIRECT	GO:0048254~snoRNA localization	2	1.26582	0.0327742	Q6DFW4, P35550	151	4	18082	59.8742	1	0.690336	40.8731
GOTERM_BP_DIRECT	GO:0045006~DNA deamination	2	1.26582	0.0327742	Q9CRA8, Q921I9	151	4	18082	59.8742	1	0.690336	40.8731
GOTERM_MF_DIRECT	GO:0004614~phosphoglucomutase activity	2	1.26582	0.0341771	Q7TSV4, Q9D0F9	152	4	17446	57.3882	0.999999	0.41789	38.3115
GOTERM_MF_DIRECT	GO:0016615~malate dehydrogenase activity	2	1.26582	0.0341771	P08249, P14152	152	4	17446	57.3882	0.999999	0.41789	38.3115
GOTERM_MF_DIRECT	GO:0031720~haptoglobin binding	2	1.26582	0.0341771	P02088, P01942	152	4	17446	57.3882	0.999999	0.41789	38.3115
GOTERM_CC_DIRECT	GO:0022625~cytosolic large ribosomal subunit	4	2.53165	0.0352795	P99027, Q8BVY0, P61358, Q9CXW4	156	91	19662	5.54015	0.999768	0.284479	36.9613
GOTERM_CC_DIRECT	GO:0005623~cell	6	3.79747	0.0363557	O08709, P99029, P47791, Q9Z0P5, Q9CYN2, Q80Y14	156	231	19662	3.27373	0.999821	0.282422	37.8588
GOTERM_MF_DIRECT	GO:0000062~fatty-acyl-CoA binding	3	1.89873	0.0367512	P51174, P53810, Q9JHI5	152	35	17446	9.83797	1	0.428912	40.5565
GOTERM_CC_DIRECT	GO:0031838~haptoglobin-hemoglobin complex	2	1.26582	0.0388034	P02088, P01942	156	5	19662	50.4154	0.999901	0.289317	39.8564
GOTERM_BP_DIRECT	GO:0006605~protein targeting	3	1.89873	0.0395541	Q60953, P63101, Q9CXW4	151	38	18082	9.45382	1	0.746088	47.0811
GOTERM_BP_DIRECT	GO:0042594~response to starvation	3	1.89873	0.0395541	Q9D0K2, Q8QZT1, P54822	151	38	18082	9.45382	1	0.746088	47.0811
GOTERM_BP_DIRECT	GO:0071051~polyadenylation-dependent snoRNA 3'-end processing	2	1.26582	0.0407997	Q9CRA8, Q921I9	151	5	18082	47.8993	1	0.745304	48.1531
GOTERM_BP_DIRECT	GO:0050434~positive regulation of viral transcription	2	1.26582	0.0407997	P62962, P62915	151	5	18082	47.8993	1	0.745304	48.1531
GOTERM_BP_DIRECT	GO:0098869~cellular oxidant detoxification	2	1.26582	0.0407997	P02088, P01942	151	5	18082	47.8993	1	0.745304	48.1531
GOTERM_BP_DIRECT	GO:0071704~organic substance metabolic process	2	1.26582	0.0407997	Q7TSV4, Q9D0F9	151	5	18082	47.8993	1	0.745304	48.1531
GOTERM_BP_DIRECT	GO:0006089~lactate metabolic process	2	1.26582	0.0407997	P16125, Q791V5	151	5	18082	47.8993	1	0.745304	48.1531
GOTERM_BP_DIRECT	GO:0006167~AMP biosynthetic process	2	1.26582	0.0407997	Q9CS42, P54822	151	5	18082	47.8993	1	0.745304	48.1531
GOTERM_MF_DIRECT	GO:0051117~ATPase binding	4	2.53165	0.0409172	Q6DFW4, P35550, Q9QYJ3, Q9D0T1	152	88	17446	5.21711	1	0.452236	44.0301
GOTERM_BP_DIRECT	GO:0033077~T cell differentiation in thymus	3	1.89873	0.04147	Q99PV8, Q61160, Q99M87	151	39	18082	9.21141	1	0.739663	48.7215
GOTERM_MF_DIRECT	GO:0010385~double-stranded methylated DNA binding	2	1.26582	0.0425385	Q9Z2D6, Q9QZQ8	152	5	17446	45.9105	1	0.453335	45.3302
GOTERM_MF_DIRECT	GO:0019900~kinase binding	4	2.53165	0.045686	P70296, P20108, Q99LX0, P16125	152	92	17446	4.99027	1	0.465949	47.7745
GOTERM_CC_DIRECT	GO:0031966~mitochondrial membrane	4	2.53165	0.0457537	P51174, Q9DCT2, Q91V61, Q9JHI5	156	101	19662	4.99162	0.999982	0.322754	45.2102
GOTERM_CC_DIRECT	GO:0008278~cohesin complex	2	1.26582	0.0463827	Q61550, Q924K8	156	6	19662	42.0128	0.999984	0.317219	45.6724
GOTERM_CC_DIRECT	GO:0070761~pre-snoRNP complex	2	1.26582	0.0463827	Q6DFW4, Q9D6Z1	156	6	19662	42.0128	0.999984	0.317219	45.6724
GOTERM_CC_DIRECT	GO:0001740~Barr body	2	1.26582	0.0463827	Q9QZQ8, P0C0S6	156	6	19662	42.0128	0.999984	0.317219	45.6724
GOTERM_CC_DIRECT	GO:0005622~intracellular	20	12.6582	0.0470936	P19157, Q60953, Q9CQI6, Q6P069, Q9Z0P5, Q6NSR8, Q9CYN2, Q62426, Q62293, Q8BFR5, P99027, Q99PV8, P52332, P53810, P28352, Q9Z0J0, Q7TPR4, O88673, P61965, Q9CXW4	156	1599	19662	1.57647	0.999987	0.312472	46.1904
GOTERM_BP_DIRECT	GO:1901029~negative regulation of mitochondrial outer membrane permeabilization involved in apoptotic signaling pathway	2	1.26582	0.048759	P51881, Q8BWT1	151	6	18082	39.9161	1	0.785337	54.537
GOTERM_BP_DIRECT	GO:0019674~NAD metabolic process	2	1.26582	0.048759	P16125, P14152	151	6	18082	39.9161	1	0.785337	54.537
GOTERM_BP_DIRECT	GO:0006104~succinyl-CoA metabolic process	2	1.26582	0.048759	Q9Z2I8, Q9Z2I9	151	6	18082	39.9161	1	0.785337	54.537
GOTERM_MF_DIRECT	GO:0031492~nucleosomal DNA binding	3	1.89873	0.0489838	P18608, Q9QZQ8, P0C0S6	152	41	17446	8.39827	1	0.478601	50.2264
GOTERM_BP_DIRECT	GO:0006412~translation	8	5.06329	0.0499763	Q8BVY0, P59325, P61358, P51881, Q8BIJ6, Q9CXW4, Q8BH59, Q8BFR5	151	401	18082	2.38899	1	0.783525	55.4458
GOTERM_MF_DIRECT	GO:0004749~ribose phosphate diphosphokinase activity	2	1.26582	0.050828	Q9CS42, Q8R574	152	6	17446	38.2588	1	0.480345	51.5506
GOTERM_CC_DIRECT	GO:0042645~mitochondrial nucleoid	3	1.89873	0.0509916	O08756, P51881, Q8BFR5	156	46	19662	8.2199	0.999995	0.325225	48.9507
GOTERM_BP_DIRECT	GO:0006635~fatty acid beta-oxidation	3	1.89873	0.0515503	Q8QZT1, Q61425, Q8BWT1	151	44	18082	8.16466	1	0.784181	56.5958
GOTERM_CC_DIRECT	GO:0015030~Cajal body	3	1.89873	0.0529893	Q9ESX5, Q6DFW4, P35550	156	47	19662	8.04501	0.999997	0.32728	50.3141
GOTERM_CC_DIRECT	GO:0001651~dense fibrillar component	2	1.26582	0.0539026	P35550, Q9D0T1	156	7	19662	36.011	0.999998	0.323773	50.9262
GOTERM_BP_DIRECT	GO:1903672~positive regulation of sprouting angiogenesis	2	1.26582	0.0566526	P52332, P63158	151	7	18082	34.2138	1	0.806274	60.1352
GOTERM_BP_DIRECT	GO:0009156~ribonucleoside monophosphate biosynthetic process	2	1.26582	0.0566526	Q9CS42, P54822	151	7	18082	34.2138	1	0.806274	60.1352
GOTERM_MF_DIRECT	GO:0008379~thioredoxin peroxidase activity	2	1.26582	0.0590462	P20108, P99029	152	7	17446	32.7932	1	0.522812	57.0636
GOTERM_MF_DIRECT	GO:0001094~TFIID-class transcription factor binding	2	1.26582	0.0590462	Q6DFW4, P35550	152	7	17446	32.7932	1	0.522812	57.0636
GOTERM_MF_DIRECT	GO:0005515~protein binding	45	28.481	0.0620009	Q60953, Q9CQI6, Q62093, Q6P069, P13020, P61079, Q8BMS9, Q6Q899, P52332, P63101, P17225, Q921M7, P43274, Q99M87, P11352, O35892, P43275, O70400, P97372, P24527, P68037, Q9ESX5, Q8BVY0, P97371, Q9Z2D6, O88712, Q921I9, P24161, P62962, Q80UU9, Q99PV8, Q61160, O55125, Q9WV55, P62915, Q61550, Q99LX0, P18608, Q7TPR4, P70429, P61965, P27048, Q9CXW4, Q924K8, O35295	152	4092	17446	1.2622	1	0.529753	58.8991
GOTERM_BP_DIRECT	GO:0014823~response to activity	3	1.89873	0.062404	P70296, Q9D0K2, Q61425	151	49	18082	7.33153	1	0.828478	63.8
GOTERM_BP_DIRECT	GO:0006749~glutathione metabolic process	3	1.89873	0.062404	P19157, P47791, P11352	151	49	18082	7.33153	1	0.828478	63.8
GOTERM_BP_DIRECT	GO:0042493~response to drug	7	4.43038	0.0635572	P70296, Q9D0K2, P03958, Q9QYB5, P63101, P28352, Q61425	151	339	18082	2.47268	1	0.825906	64.4958
GOTERM_BP_DIRECT	GO:0046826~negative regulation of protein export from nucleus	2	1.26582	0.0644813	Q99LX0, O35892	151	8	18082	29.9371	1	0.822315	65.0442
GOTERM_BP_DIRECT	GO:0034475~U4 snRNA 3'-end processing	2	1.26582	0.0644813	Q9CRA8, Q921I9	151	8	18082	29.9371	1	0.822315	65.0442
GOTERM_CC_DIRECT	GO:0000228~nuclear chromosome	3	1.89873	0.0655337	Q61550, Q9QZQ8, P62806	156	53	19662	7.13425	1	0.371545	58.1368
GOTERM_MF_DIRECT	GO:0003857~3-hydroxyacyl-CoA dehydrogenase activity	2	1.26582	0.0671936	O08756, Q61425	152	8	17446	28.6941	1	0.548789	61.9495
GOTERM_MF_DIRECT	GO:0016868~intramolecular transferase activity, phosphotransferases	2	1.26582	0.0671936	Q7TSV4, Q9D0F9	152	8	17446	28.6941	1	0.548789	61.9495
GOTERM_MF_DIRECT	GO:1990446~U1 snRNP binding	2	1.26582	0.0671936	P62317, P27048	152	8	17446	28.6941	1	0.548789	61.9495
GOTERM_BP_DIRECT	GO:0034427~nuclear-transcribed mRNA catabolic process, exonucleolytic, 3'-5'	2	1.26582	0.0722453	Q9CRA8, Q921I9	151	9	18082	26.6107	1	0.84952	69.349
GOTERM_BP_DIRECT	GO:0071028~nuclear mRNA surveillance	2	1.26582	0.0722453	Q9CRA8, Q921I9	151	9	18082	26.6107	1	0.84952	69.349
GOTERM_BP_DIRECT	GO:0035067~negative regulation of histone acetylation	2	1.26582	0.0722453	Q9Z2D6, O88712	151	9	18082	26.6107	1	0.84952	69.349
GOTERM_BP_DIRECT	GO:0042743~hydrogen peroxide metabolic process	2	1.26582	0.0722453	P62897, Q99LX0	151	9	18082	26.6107	1	0.84952	69.349
GOTERM_BP_DIRECT	GO:0045471~response to ethanol	4	2.53165	0.0736027	P70296, Q9D0K2, P19157, P13020	151	117	18082	4.09396	1	0.847811	70.0486
GOTERM_MF_DIRECT	GO:0061133~endopeptidase activator activity	2	1.26582	0.075271	P97371, P97372	152	9	17446	25.5058	1	0.580941	66.2797
GOTERM_MF_DIRECT	GO:0003691~double-stranded telomeric DNA binding	2	1.26582	0.075271	P28352, O35295	152	9	17446	25.5058	1	0.580941	66.2797
GOTERM_BP_DIRECT	GO:0001666~response to hypoxia	5	3.16456	0.07598	P03958, Q60953, P54822, Q9Z2D6, O70400	151	192	18082	3.11845	1	0.850199	71.2379
GOTERM_CC_DIRECT	GO:0005687~U4 snRNP	2	1.26582	0.0761105	P62317, P27048	156	10	19662	25.2077	1	0.409626	63.8322
GOTERM_CC_DIRECT	GO:0070469~respiratory chain	3	1.89873	0.0766609	P62897, P00405, Q9DCT2	156	58	19662	6.51923	1	0.403225	64.108
GOTERM_CC_DIRECT	GO:0000785~chromatin	4	2.53165	0.0777456	P18608, Q61550, Q99LX0, Q9QZQ8	156	126	19662	4.00122	1	0.399304	64.6459
GOTERM_CC_DIRECT	GO:0000784~nuclear chromosome, telomeric region	4	2.53165	0.0791866	Q60953, Q8K224, Q9QZQ8, P62806	156	127	19662	3.96972	1	0.397002	65.349
GOTERM_BP_DIRECT	GO:0006268~DNA unwinding involved in DNA replication	2	1.26582	0.0799454	Q64511, O35295	151	10	18082	23.9497	1	0.858309	73.1239
GOTERM_BP_DIRECT	GO:0009165~nucleotide biosynthetic process	2	1.26582	0.0799454	Q9CS42, Q8R574	151	10	18082	23.9497	1	0.858309	73.1239
GOTERM_BP_DIRECT	GO:0045010~actin nucleation	2	1.26582	0.0799454	P70429, P13020	151	10	18082	23.9497	1	0.858309	73.1239
GOTERM_BP_DIRECT	GO:0006105~succinate metabolic process	2	1.26582	0.0799454	Q9Z2I8, Q9Z2I9	151	10	18082	23.9497	1	0.858309	73.1239
GOTERM_BP_DIRECT	GO:0070301~cellular response to hydrogen peroxide	3	1.89873	0.0811833	P28352, Q99LX0, P45376	151	57	18082	6.30254	1	0.856225	73.6885
GOTERM_MF_DIRECT	GO:0050662~coenzyme binding	2	1.26582	0.083279	Q8QZT1, Q5M8N4	152	10	17446	22.9553	1	0.609202	70.1173
GOTERM_CC_DIRECT	GO:0005777~peroxisome	4	2.53165	0.0850663	P54071, Q922Q1, P99029, Q91V64	156	131	19662	3.8485	1	0.412067	68.0865
GOTERM_BP_DIRECT	GO:0032727~positive regulation of interferon-alpha production	2	1.26582	0.087582	Q6Q899, P63158	151	11	18082	21.7724	1	0.871505	76.434
GOTERM_BP_DIRECT	GO:0008154~actin polymerization or depolymerization	2	1.26582	0.087582	P70429, P13020	151	11	18082	21.7724	1	0.871505	76.434
GOTERM_BP_DIRECT	GO:0016075~rRNA catabolic process	2	1.26582	0.087582	Q9CRA8, Q921I9	151	11	18082	21.7724	1	0.871505	76.434
GOTERM_CC_DIRECT	GO:0034709~methylosome	2	1.26582	0.0906273	P62317, P27048	156	12	19662	21.0064	1	0.424995	70.4906
GOTERM_MF_DIRECT	GO:0046872~metal ion binding	37	23.4177	0.0924556	P54071, Q60953, Q91VM9, Q8K4G5, Q7TSV4, Q6P069, P13020, Q99KE1, Q8BH59, Q6Q899, P52332, Q8QZT1, Q9D0F9, Q60710, P00405, P62897, Q99M87, O70400, P24527, Q8BGB5, Q9CS42, Q9Z2I8, Q6NSR8, P03958, Q9ERU3, Q64511, Q99PV8, P28352, P62915, Q9JM14, Q7TPR4, Q80Y14, O88673, Q9Z2I9, P28474, Q8VDL4, Q924K8	152	3355	17446	1.26579	1	0.639385	74.0149
GOTERM_CC_DIRECT	GO:0005681~spliceosomal complex	4	2.53165	0.0930434	P62317, Q62093, Q6ZWM4, P27048	156	136	19662	3.70701	1	0.425927	71.4822
GOTERM_MF_DIRECT	GO:0042802~identical protein binding	10	6.32911	0.0933543	P24161, Q9CS42, Q6Q899, O08756, P63101, Q61160, P20108, Q9CQT1, Q99LX0, P16125	152	625	17446	1.83642	1	0.633313	74.3701
GOTERM_CC_DIRECT	GO:0005833~hemoglobin complex	2	1.26582	0.0978005	P02088, P01942	156	13	19662	19.3905	1	0.435016	73.3452
GOTERM_CC_DIRECT	GO:0000177~cytoplasmic exosome (RNase complex)	2	1.26582	0.0978005	Q9CRA8, Q921I9	156	13	19662	19.3905	1	0.435016	73.3452
GOTERM_MF_DIRECT	GO:0005546~phosphatidylinositol-4,5-bisphosphate binding	3	1.89873	0.0978959	P62962, Q9Z0P5, Q6PGL7	152	61	17446	5.64474	1	0.64214	76.0971
GOTERM_MF_DIRECT	GO:0036002~pre-mRNA binding	2	1.26582	0.0990887	Q62093, P17225	152	12	17446	19.1294	1	0.637521	76.5325
GOTERM_MF_DIRECT	GO:1990381~ubiquitin-specific protease binding	2	1.26582	0.0990887	P54726, Q99LX0	152	12	17446	19.1294	1	0.637521	76.5325

## Sheet: CD4_up inComb.Ther._GO annotat.
Category	Term	Count	%	PValue	Genes	List Total	Pop Hits	Pop Total	Fold Enrichment	Bonferroni	Benjamini	FDR
GOTERM_CC_DIRECT	GO:0005737~cytoplasm	61	75.3086	1.77471e-14	P07356, P11440, P68372, Q62523, Q9WUK2, Q05816, P16045, Q61881, Q8CG48, P24452, P63254, O70251, Q9Z130, P28656, Q8VI93, P46471, P04187, O54974, O35744, Q9Z1R2, Q99K85, Q8BJW6, Q8C1B7, P54227, P49312, P10605, P07724, Q9JJU8, P99024, Q78PY7, P17918, Q9DCL9, Q3UW53, E9PVX6, Q60787, Q8BP47, P16110, Q9ESY9, P13864, Q9CZY3, Q9EQK5, Q99J09, P09055, P97855, Q9R0P5, O08663, P20029, Q80UG5, O89086, Q8BGQ7,…	80	6631	19662	2.26094	3.49942e-12	3.49942e-12	2.22045e-11
GOTERM_CC_DIRECT	GO:0070062~extracellular exosome	39	48.1481	1.54664e-13	P07356, Q8VCT3, Q9CYL5, Q8BP47, P16110, P11440, P68372, Q9CZY3, Q05816, P16045, Q9EQK5, P24452, Q8CG48, P18181, Q9Z130, P09055, Q9R0P5, P28798, P20029, O54974, Q922R8, Q8BGQ7, Q91W90, Q99K85, Q8C1B7, P49312, P54227, B2RQC6, Q6IRU2, P10605, P07724, Q9JJU8, P99024, Q78PY7, P27546, P17918, Q9DCL9, Q3UW53, P10107	80	2674	19662	3.5846	3.04669e-11	1.52334e-11	1.93368e-10
GOTERM_CC_DIRECT	GO:0005913~cell-cell adherens junction	13	16.0494	4.71803e-09	P07356, Q61033, P20029, Q80UG5, Q91VX2, Q62523, Q9WUK2, Q8BJW6, Q78PY7, P24452, Q9DCL9, P09055, P10107	80	316	19662	10.111	9.29451e-07	3.09817e-07	5.89892e-06
GOTERM_MF_DIRECT	GO:0000166~nucleotide binding	29	35.8025	7.17929e-09	E9PVX6, Q8BP47, Q01320, P11440, P68372, Q9WUK2, Q8R050, P49717, Q61881, Q8CG48, Q9Z130, P46471, Q8VI93, P97855, P97311, P20029, Q8BGD9, Q80UG5, O89086, Q8BGQ7, P25206, P49312, Q8C1B7, B2RQC6, O55143, Q9Z1Q9, P99024, Q9DCL9, P37913	79	1936	17446	3.30797	1.56508e-06	1.56508e-06	9.12537e-06
GOTERM_MF_DIRECT	GO:0098641~cadherin binding involved in cell-cell adhesion	12	14.8148	4.32867e-08	Q61033, P07356, P20029, Q80UG5, Q78PY7, P24452, Q91VX2, Q9WUK2, Q9DCL9, P10107, P09055, Q8BJW6	79	279	17446	9.4983	9.43645e-06	4.71823e-06	5.50203e-05
GOTERM_CC_DIRECT	GO:0042470~melanosome	8	9.87654	1.63761e-07	P07356, P20029, P10605, Q922R8, Q78PY7, P24452, P28656, P09055	80	101	19662	19.4673	3.22605e-05	8.06521e-06	0.00020475
GOTERM_MF_DIRECT	GO:0044822~poly(A) RNA binding	20	24.6914	3.05844e-07	E9PVX6, O08663, P28798, P07356, Q8BGD9, P16110, Q01320, O89086, Q91VX2, Q9WUK2, Q62523, Q91W50, Q8R050, P49312, P16045, Q78PY7, P27546, Q9Z130, P28656, P97855	79	1113	17446	3.96829	6.66718e-05	2.22244e-05	0.000388748
GOTERM_BP_DIRECT	GO:0030261~chromosome condensation	5	6.17284	5.32074e-07	Q01320, P11440, Q8CG48, Q8K2Z4, Q8C156	78	16	18082	72.4439	0.000302705	0.000302705	0.000780124
GOTERM_CC_DIRECT	GO:0042555~MCM complex	4	4.93827	5.15361e-06	P97311, P49717, Q61881, P25206	80	9	19662	109.233	0.00101475	0.000203032	0.00644334
GOTERM_BP_DIRECT	GO:0006268~DNA unwinding involved in DNA replication	4	4.93827	8.72041e-06	P97311, P49717, Q01320, Q61881	78	10	18082	92.7282	0.00494965	0.00247789	0.0127851
GOTERM_BP_DIRECT	GO:0007049~cell cycle	13	16.0494	1.0319e-05	P97311, Q8C1B7, E9PVX6, P49717, Q99MD9, Q61881, Q80UG5, P11440, Q8CG48, Q8K2Z4, P25206, P37913, Q8C156	78	614	18082	4.90825	0.00585431	0.00195526	0.0151286
GOTERM_BP_DIRECT	GO:0006260~DNA replication	7	8.64198	1.40069e-05	P97311, P49717, Q99MD9, Q61881, P17918, P25206, P37913	78	123	18082	13.193	0.00793832	0.00199052	0.020535
GOTERM_CC_DIRECT	GO:0005634~nucleus	43	53.0864	2.4216e-05	Q80SU7, E9PVX6, P07356, P16110, Q01320, P13864, P11440, P68372, Q62523, Q9CZY3, P16045, P49717, Q9EQK5, Q61881, P24452, Q8CG48, Q99J09, Q9Z130, P28656, P97855, Q8VI93, P46471, P97311, Q61033, P20029, O54974, O89086, Q9Z1R2, O35744, P25206, Q8C156, P49312, P70677, B2RQC6, P07724, P83940, Q99MD9, P99024, Q78PY7, P17918, Q8K2Z4, P37913, P10107	80	6019	19662	1.75583	0.00475924	0.000794785	0.0302729
GOTERM_MF_DIRECT	GO:0003678~DNA helicase activity	4	4.93827	6.68436e-05	P97311, P49717, Q61881, P25206	79	18	17446	49.0745	0.0144667	0.00363647	0.0849295
GOTERM_MF_DIRECT	GO:0005524~ATP binding	19	23.4568	9.10194e-05	P97311, E9PVX6, P20029, Q8BP47, Q01320, P11440, Q8BGQ7, P25206, B2RQC6, O55143, P49717, Q9Z1Q9, Q61881, Q8CG48, Q9DCL9, P37913, Q8VI93, P97855, P46471	79	1507	17446	2.78426	0.0196475	0.00396076	0.11563
GOTERM_BP_DIRECT	GO:0006270~DNA replication initiation	4	4.93827	0.000140901	P97311, P49717, Q61881, P25206	78	24	18082	38.6368	0.0770482	0.0159078	0.20639
GOTERM_CC_DIRECT	GO:0001725~stress fiber	5	6.17284	0.000152665	Q8C1B7, P07356, Q6IRU2, Q80UG5, Q62523	80	67	19662	18.3414	0.0296294	0.00428753	0.190708
GOTERM_CC_DIRECT	GO:0000796~condensin complex	3	3.7037	0.000158155	Q8CG48, Q8K2Z4, Q8C156	80	5	19662	147.465	0.0306786	0.0038873	0.197561
GOTERM_CC_DIRECT	GO:0000784~nuclear chromosome, telomeric region	6	7.40741	0.000159742	P97311, P49717, Q61881, P11440, P17918, P25206	80	127	19662	11.6114	0.0309815	0.00349074	0.199541
GOTERM_MF_DIRECT	GO:0005515~protein binding	34	41.9753	0.000171313	P01872, P07356, Q60787, P16110, P13864, P11440, Q9CZY3, Q62523, P16045, P49717, Q61881, P18181, Q99J09, O70251, P28656, P09055, P46471, P97855, P97311, O08663, Q61033, P20029, P04187, Q8BGQ7, Q9Z1R2, Q8C1B7, P54227, O55143, P83940, Q99MD9, Q78PY7, P27546, P17918, P10107	79	4092	17446	1.8349	0.0366606	0.00620557	0.217532
GOTERM_CC_DIRECT	GO:0005654~nucleoplasm	20	24.6914	0.000184604	P97311, Q01320, P11440, P13864, O89086, Q9Z1R2, P25206, P49312, B2RQC6, P49717, Q99MD9, Q61881, P24452, P17918, Q9Z130, Q99J09, Q8K2Z4, P10107, P37913, Q8VI93	80	1935	19662	2.54031	0.035717	0.00363044	0.230565
GOTERM_CC_DIRECT	GO:0043234~protein complex	11	13.5802	0.000203779	B2RQC6, P07356, O55143, P07724, Q99MD9, P99024, Q01320, P13864, P18181, Q9CZY3, P10107	80	628	19662	4.30498	0.0393533	0.00364322	0.254485
GOTERM_CC_DIRECT	GO:0000793~condensed chromosome	4	4.93827	0.000234392	E9PVX6, Q01320, Q8CG48, Q8K2Z4	80	30	19662	32.77	0.0451305	0.00384099	0.292664
GOTERM_MF_DIRECT	GO:0004386~helicase activity	6	7.40741	0.000280308	P97311, P49717, Q61881, P25206, P10107, P97855	79	129	17446	10.2714	0.0592855	0.0086928	0.355706
GOTERM_BP_DIRECT	GO:0006412~translation	9	11.1111	0.000301938	Q8BGD9, Q8BP47, Q9Z1Q9, O89086, O70251, Q9WUK2, Q8BGQ7, Q8BJW6, Q8R050	78	401	18082	5.20295	0.157876	0.0282319	0.441789
GOTERM_BP_DIRECT	GO:0034976~response to endoplasmic reticulum stress	5	6.17284	0.00030912	P20029, O55143, Q922R8, Q3UW53, Q91W90	78	76	18082	15.2513	0.161312	0.0248178	0.452276
GOTERM_MF_DIRECT	GO:0003697~single-stranded DNA binding	5	6.17284	0.000519852	P49312, P97311, P49717, Q61881, P10107	79	83	17446	13.3033	0.107168	0.0140697	0.658759
GOTERM_CC_DIRECT	GO:0005829~cytosol	18	22.2222	0.000612438	P01872, Q80SU7, P07356, Q60787, P04187, Q8BGQ7, Q9Z1R2, Q8R050, P54227, B2RQC6, P70677, P16045, Q61881, P99024, Q99J09, Q9DCL9, P10107, P97855	80	1784	19662	2.47979	0.113689	0.00924067	0.763036
GOTERM_BP_DIRECT	GO:0051301~cell division	8	9.87654	0.00106274	Q8C1B7, Q80UG5, P11440, Q8CG48, P27546, Q8K2Z4, P37913, Q8C156	78	374	18082	4.95873	0.453936	0.0728383	1.54692
GOTERM_BP_DIRECT	GO:0098609~cell-cell adhesion	6	7.40741	0.00127206	Q61033, Q78PY7, P24452, Q91VX2, Q9WUK2, Q9DCL9	78	189	18082	7.35938	0.515319	0.0773209	1.84898
GOTERM_BP_DIRECT	GO:0007076~mitotic chromosome condensation	3	3.7037	0.00135432	Q8CG48, Q8K2Z4, Q8C156	78	13	18082	53.497	0.537509	0.0742147	1.96743
GOTERM_MF_DIRECT	GO:0004003~ATP-dependent DNA helicase activity	3	3.7037	0.00430173	P97311, P49717, Q61881	79	22	17446	30.1139	0.609294	0.0991551	5.33216
GOTERM_MF_DIRECT	GO:0043236~laminin binding	3	3.7037	0.00598269	P16045, P16110, P09055	79	26	17446	25.481	0.729679	0.122619	7.34363
GOTERM_CC_DIRECT	GO:0048471~perinuclear region of cytoplasm	9	11.1111	0.00655143	P01872, P07356, P10605, O55143, Q9EQK5, Q80UG5, Q9WUK2, P25206, P09055	80	692	19662	3.1965	0.726069	0.0883428	7.88953
GOTERM_MF_DIRECT	GO:0003723~RNA binding	10	12.3457	0.0078842	P49312, Q8BGD9, O89086, P13864, Q9WUK2, Q8BGQ7, Q9Z130, Q91W50, P97855, Q8VI93	79	780	17446	2.83122	0.821928	0.145185	9.5715
GOTERM_MF_DIRECT	GO:0042277~peptide binding	4	4.93827	0.00836155	Q8VCT3, P10605, P63254, P09055	79	93	17446	9.4983	0.839664	0.141475	10.123
GOTERM_BP_DIRECT	GO:0097010~eukaryotic translation initiation factor 4F complex assembly	2	2.46914	0.00849886	Q8BGD9, Q9WUK2	78	2	18082	231.821	0.992222	0.35693	11.7629
GOTERM_MF_DIRECT	GO:0034057~RNA strand-exchange activity	2	2.46914	0.00892214	Q8BGD9, Q9WUK2	79	2	17446	220.835	0.858259	0.139541	10.7667
GOTERM_CC_DIRECT	GO:0009897~external side of plasma membrane	6	7.40741	0.00900274	P01872, Q8VCT3, P10605, P16110, P18181, P09055	80	317	19662	4.65189	0.831627	0.111989	10.6912
GOTERM_CC_DIRECT	GO:0005576~extracellular region	15	18.5185	0.00954695	P01872, P28798, P07356, Q8VCT3, P20029, Q9CYL5, O54974, P16110, Q9ESY9, O35744, P16045, P10605, P07724, P24452, P10107	80	1753	19662	2.10304	0.848896	0.111403	11.3025
GOTERM_CC_DIRECT	GO:0042383~sarcolemma	4	4.93827	0.0119693	P07356, P10605, P10107, P09055	80	118	19662	8.33136	0.906723	0.130242	13.9769
GOTERM_MF_DIRECT	GO:0004812~aminoacyl-tRNA ligase activity	3	3.7037	0.0131392	Q8BP47, Q9Z1Q9, Q8BGQ7	79	39	17446	16.9873	0.944052	0.186128	15.4744
GOTERM_CC_DIRECT	GO:0009986~cell surface	8	9.87654	0.0131809	P01872, P07356, P16045, P20029, P10605, P16110, P10107, P09055	80	629	19662	3.12591	0.926752	0.135165	15.2866
GOTERM_BP_DIRECT	GO:0008283~cell proliferation	5	6.17284	0.0144543	E9PVX6, Q9EQK5, Q99MD9, Q61881, P11440	78	220	18082	5.26865	0.999748	0.498613	19.2228
GOTERM_CC_DIRECT	GO:0072686~mitotic spindle	3	3.7037	0.0153302	P24452, P11440, P27546	80	47	19662	15.6878	0.952329	0.14801	17.5647
GOTERM_CC_DIRECT	GO:0045298~tubulin complex	2	2.46914	0.0159762	P99024, P68372	80	4	19662	122.888	0.958111	0.146693	18.2384
GOTERM_CC_DIRECT	GO:0005615~extracellular space	13	16.0494	0.0165128	P01872, P07356, P28798, Q8VCT3, O54974, P16110, Q8BJW6, P16045, P10605, P07724, Q9JJU8, P10107, Q8VI93	80	1504	19662	2.12438	0.962378	0.144611	18.7941
GOTERM_BP_DIRECT	GO:0045185~maintenance of protein location	2	2.46914	0.0169264	P16045, P16110	78	4	18082	115.91	0.99994	0.526308	22.1432
GOTERM_BP_DIRECT	GO:0071466~cellular response to xenobiotic stimulus	2	2.46914	0.0169264	Q61881, P17918	78	4	18082	115.91	0.99994	0.526308	22.1432
GOTERM_BP_DIRECT	GO:0006457~protein folding	4	4.93827	0.0173288	P99024, Q922R8, Q8BGQ7, Q91W90	78	128	18082	7.24439	0.999952	0.508585	22.6092
GOTERM_MF_DIRECT	GO:0033592~RNA strand annealing activity	2	2.46914	0.0177657	Q8BGD9, Q9WUK2	79	4	17446	110.418	0.979914	0.229346	20.3752
GOTERM_MF_DIRECT	GO:0019834~phospholipase A2 inhibitor activity	2	2.46914	0.0177657	P07356, P10107	79	4	17446	110.418	0.979914	0.229346	20.3752
GOTERM_MF_DIRECT	GO:0016787~hydrolase activity	14	17.284	0.0178323	P97311, O08663, P70677, B2RQC6, Q8VCT3, O55143, P49717, P10605, P04187, Q61881, O35744, P25206, P46471, P97855	79	1533	17446	2.01676	0.980209	0.217419	20.4438
GOTERM_CC_DIRECT	GO:0000228~nuclear chromosome	3	3.7037	0.0192422	Q01320, Q8CG48, Q8K2Z4	80	53	19662	13.9118	0.978239	0.15969	21.5672
GOTERM_CC_DIRECT	GO:0016281~eukaryotic translation initiation factor 4F complex	2	2.46914	0.0199307	Q8BGD9, Q9WUK2	80	5	19662	98.31	0.981051	0.158387	22.253
GOTERM_CC_DIRECT	GO:0005925~focal adhesion	6	7.40741	0.0205932	Q6IRU2, P20029, Q62523, P10107, P09055, P97855	80	391	19662	3.77148	0.983414	0.15701	22.9074
GOTERM_BP_DIRECT	GO:0010032~meiotic chromosome condensation	2	2.46914	0.0211136	Q8CG48, Q8K2Z4	78	5	18082	92.7282	0.999995	0.554914	26.8664
GOTERM_MF_DIRECT	GO:0032403~protein complex binding	6	7.40741	0.0220669	P70677, P10605, P83940, P99024, P24452, P09055	79	358	17446	3.70115	0.992284	0.248846	24.6953
GOTERM_BP_DIRECT	GO:0006413~translational initiation	3	3.7037	0.0222039	Q8BGD9, Q9WUK2, Q8BJW6	78	54	18082	12.8789	0.999997	0.550007	28.0517
GOTERM_MF_DIRECT	GO:0016874~ligase activity	6	7.40741	0.0230188	B2RQC6, Q8BP47, Q9Z1Q9, Q9DCL9, Q8BGQ7, P37913	79	362	17446	3.66026	0.99376	0.245758	25.6216
GOTERM_BP_DIRECT	GO:0031100~organ regeneration	3	3.7037	0.0237653	E9PVX6, B2RQC6, P11440	78	56	18082	12.419	0.999999	0.552932	29.718
GOTERM_MF_DIRECT	GO:0043022~ribosome binding	3	3.7037	0.0260084	P20029, Q9Z1R2, Q8BJW6	79	56	17446	11.8305	0.996801	0.260929	28.4633
GOTERM_MF_DIRECT	GO:0004859~phospholipase inhibitor activity	2	2.46914	0.0265313	P07356, P10107	79	6	17446	73.6118	0.997154	0.25405	28.95
GOTERM_MF_DIRECT	GO:0005525~GTP binding	6	7.40741	0.028454	Q80SU7, Q8C1B7, P99024, Q80UG5, P68372, Q8R050	79	383	17446	3.45956	0.998151	0.258932	30.7131
GOTERM_MF_DIRECT	GO:0019899~enzyme binding	6	7.40741	0.0287315	B2RQC6, P20029, O55143, P07724, Q01320, P17918	79	384	17446	3.45055	0.998262	0.250892	30.9642
GOTERM_CC_DIRECT	GO:0031012~extracellular matrix	5	6.17284	0.03071	P16045, P20029, P16110, P99024, P68372	80	294	19662	4.17985	0.997855	0.217912	32.2932
GOTERM_BP_DIRECT	GO:0030855~epithelial cell differentiation	3	3.7037	0.0331151	P10605, P16110, P11440	78	67	18082	10.38	1	0.655111	38.967
GOTERM_CC_DIRECT	GO:0005856~cytoskeleton	10	12.3457	0.0340953	P54227, Q8C1B7, Q6IRU2, Q9EQK5, P99024, Q80UG5, P11440, P27546, P68372, Q62523	80	1113	19662	2.20822	0.998923	0.231138	35.1911
GOTERM_MF_DIRECT	GO:0003743~translation initiation factor activity	3	3.7037	0.0371779	Q8BGD9, Q9WUK2, Q8BJW6	79	68	17446	9.74274	0.999741	0.301695	38.2184
GOTERM_BP_DIRECT	GO:0031340~positive regulation of vesicle fusion	2	2.46914	0.0376872	P07356, P10107	78	9	18082	51.5157	1	0.683506	43.0645
GOTERM_BP_DIRECT	GO:0014075~response to amine	2	2.46914	0.0376872	B2RQC6, P11440	78	9	18082	51.5157	1	0.683506	43.0645
GOTERM_BP_DIRECT	GO:0071236~cellular response to antibiotic	2	2.46914	0.0376872	P20029, P63254	78	9	18082	51.5157	1	0.683506	43.0645
GOTERM_MF_DIRECT	GO:0019904~protein domain specific binding	5	6.17284	0.0405289	P20029, P99024, P24452, P13864, P09055	79	289	17446	3.82068	0.999879	0.313264	40.8965
GOTERM_CC_DIRECT	GO:0005874~microtubule	5	6.17284	0.0427121	P54227, P99024, Q80UG5, P27546, P68372	80	327	19662	3.75803	0.999816	0.272755	42.0603
GOTERM_CC_DIRECT	GO:0034663~endoplasmic reticulum chaperone complex	2	2.46914	0.0471764	P20029, Q922R8	80	12	19662	40.9625	0.999927	0.288233	45.3494
GOTERM_MF_DIRECT	GO:0002161~aminoacyl-tRNA editing activity	2	2.46914	0.048109	Q9Z1Q9, Q8BGQ7	79	11	17446	40.1519	0.999979	0.34945	46.5646
GOTERM_MF_DIRECT	GO:0001948~glycoprotein binding	3	3.7037	0.0487365	P16045, P20029, P09055	79	79	17446	8.38616	0.999981	0.34225	47.0106
GOTERM_CC_DIRECT	GO:0005694~chromosome	5	6.17284	0.0497967	E9PVX6, Q61033, Q8CG48, Q8K2Z4, Q8C156	80	344	19662	3.57231	0.999957	0.293186	47.1991
GOTERM_BP_DIRECT	GO:0016485~protein processing	3	3.7037	0.0520004	P70677, O08663, P04187	78	86	18082	8.08676	1	0.781127	54.2952
GOTERM_MF_DIRECT	GO:0044548~S100 protein binding	2	2.46914	0.0523675	P07356, O55143	79	12	17446	36.8059	0.999992	0.352277	49.5249
GOTERM_BP_DIRECT	GO:0045576~mast cell activation	2	2.46914	0.0539838	Q60787, P18181	78	13	18082	35.6647	1	0.777686	55.6774
GOTERM_MF_DIRECT	GO:0051787~misfolded protein binding	2	2.46914	0.0566073	P20029, Q9Z1R2	79	13	17446	33.9747	0.999997	0.364723	52.3213
GOTERM_MF_DIRECT	GO:0043024~ribosomal small subunit binding	2	2.46914	0.0566073	Q8BGD9, Q9WUK2	79	13	17446	33.9747	0.999997	0.364723	52.3213
GOTERM_BP_DIRECT	GO:0042493~response to drug	5	6.17284	0.0566241	P16045, Q61881, P11440, P13864, P10107	78	339	18082	3.41918	1	0.77856	57.457
GOTERM_CC_DIRECT	GO:0005604~basement membrane	3	3.7037	0.0580947	P07356, P07724, P09055	80	97	19662	7.60129	0.999992	0.324984	52.6834
GOTERM_BP_DIRECT	GO:0043149~stress fiber assembly	2	2.46914	0.0620296	Q62523, P09055	78	15	18082	30.9094	1	0.794892	60.8946
GOTERM_MF_DIRECT	GO:0003677~DNA binding	14	17.284	0.0653012	P97311, E9PVX6, Q61033, Q01320, P13864, P25206, Q91W50, P49717, P07724, Q61881, P17918, Q9Z130, P37913, P97855	79	1847	17446	1.6739	1	0.39809	57.6145
GOTERM_CC_DIRECT	GO:0005788~endoplasmic reticulum lumen	3	3.7037	0.0656523	P20029, Q922R8, Q91W90	80	104	19662	7.08966	0.999998	0.350489	57.2172
GOTERM_BP_DIRECT	GO:0021680~cerebellar Purkinje cell layer development	2	2.46914	0.0660272	P20029, Q8BGQ7	78	16	18082	28.9776	1	0.801996	63.2683
GOTERM_CC_DIRECT	GO:0005623~cell	4	4.93827	0.0661169	O55143, Q922R8, P17918, Q91W90	80	231	19662	4.25584	0.999999	0.343684	57.4824
GOTERM_MF_DIRECT	GO:0008301~DNA binding, bending	2	2.46914	0.0692144	Q01320, P63254	79	16	17446	27.6044	1	0.406199	59.8156
GOTERM_BP_DIRECT	GO:0043277~apoptotic cell clearance	2	2.46914	0.0739719	Q922R8, Q91W90	78	18	18082	25.7578	1	0.826073	67.5926
GOTERM_MF_DIRECT	GO:0003823~antigen binding	3	3.7037	0.0750712	P01872, P06330, P18181	79	101	17446	6.55947	1	0.42235	62.9137
GOTERM_CC_DIRECT	GO:0005657~replication fork	2	2.46914	0.0773995	P13864, P17918	80	20	19662	24.5775	1	0.381781	63.4768
GOTERM_MF_DIRECT	GO:0008327~methyl-CpG binding	2	2.46914	0.0775266	P13864, Q99J09	79	18	17446	24.5373	1	0.422904	64.1459
GOTERM_BP_DIRECT	GO:0002376~immune system process	5	6.17284	0.0806369	P16110, Q9ESY9, Q9Z1R2, P10107, Q8VI93	78	383	18082	3.02638	1	0.841172	70.8494
GOTERM_CC_DIRECT	GO:0043231~intracellular membrane-bounded organelle	7	8.64198	0.0813256	P28798, P10605, Q9ESY9, Q9Z1R2, P25206, P37913, P46471	80	751	19662	2.29085	1	0.388278	65.3732
GOTERM_MF_DIRECT	GO:0070006~metalloaminopeptidase activity	2	2.46914	0.0816552	O08663, Q8VCT3	79	19	17446	23.2458	1	0.430342	66.1329
GOTERM_BP_DIRECT	GO:0006164~purine nucleotide biosynthetic process	2	2.46914	0.0818499	Q9DCL9, Q8VI93	78	20	18082	23.1821	1	0.834636	71.4083
GOTERM_BP_DIRECT	GO:0006259~DNA metabolic process	2	2.46914	0.0818499	E9PVX6, Q01320	78	20	18082	23.1821	1	0.834636	71.4083
GOTERM_MF_DIRECT	GO:0030246~carbohydrate binding	4	4.93827	0.0831027	P16045, P16110, O54974, O35744	79	229	17446	3.85739	1	0.426664	66.8052
GOTERM_BP_DIRECT	GO:0001649~osteoblast differentiation	3	3.7037	0.0837363	Q6IRU2, Q78PY7, P46471	78	113	18082	6.15453	1	0.830877	72.2576
GOTERM_MF_DIRECT	GO:0003756~protein disulfide isomerase activity	2	2.46914	0.0857655	Q922R8, Q91W90	79	20	17446	22.0835	1	0.427936	68.0099
GOTERM_CC_DIRECT	GO:0045121~membrane raft	4	4.93827	0.0886354	P70677, P07356, P18181, P09055	80	262	19662	3.75229	1	0.406905	68.6647
GOTERM_BP_DIRECT	GO:0043066~negative regulation of apoptotic process	6	7.40741	0.0935121	P70677, P20029, P16110, P07724, P11440, Q9Z1R2	78	566	18082	2.45746	1	0.854316	76.2949
GOTERM_MF_DIRECT	GO:0016853~isomerase activity	3	3.7037	0.0936907	Q922R8, Q01320, Q91W90	79	115	17446	5.76092	1	0.448831	71.3612
GOTERM_BP_DIRECT	GO:0006417~regulation of translation	3	3.7037	0.0940405	O89086, Q3UW53, Q8BJW6	78	121	18082	5.74762	1	0.846363	76.4967
GOTERM_BP_DIRECT	GO:0006915~apoptotic process	6	7.40741	0.0956492	P70677, P16045, P04187, O54974, P11440, Q9Z1R2	78	570	18082	2.44022	1	0.842031	77.1012
GOTERM_CC_DIRECT	GO:0030496~midbody	3	3.7037	0.0962526	P07356, P20029, P11440	80	130	19662	5.67173	1	0.425249	71.7864
GOTERM_MF_DIRECT	GO:0002020~protease binding	3	3.7037	0.0964512	P70677, P07356, P09055	79	117	17446	5.66245	1	0.449862	72.4504
GOTERM_MF_DIRECT	GO:0003676~nucleic acid binding	10	12.3457	0.0999044	P49312, Q8BGD9, Q8BP47, Q78PY7, O89086, Q9WUK2, Q8BGQ7, Q9Z130, Q91W50, P97855	79	1237	17446	1.78525	1	0.453285	73.7592

## Sheet: CD8_up in FV Inf._GO annotation
Category	Term	Count	%	PValue	Genes	List Total	Pop Hits	Pop Total	Fold Enrichment	Bonferroni	Benjamini	FDR
GOTERM_CC_DIRECT	GO:0005739~mitochondrion	39	37.5	1.60205e-15	Q9D0K2, P54071, Q91VM9, Q922Q1, Q9DAR7, Q9D172, Q6P069, P47791, Q9WUM5, P14152, Q8BH59, Q99L43, O08709, Q8QZT1, P62897, Q99M87, P11352, Q91V61, P19157, O08756, Q9D0L7, Q9Z2I8, Q61425, Q9Z2D6, Q9JHI5, Q8BFR5, P99029, Q80XN0, O55125, P28352, Q9JM14, Q99LX0, Q9DCT2, P51881, Q78IK2, Q8BWT1, Q9Z2I9, P35486, Q8R4N0	102	1721	19662	4.36829	2.79776e-13	2.79776e-13	1.90958e-12
GOTERM_CC_DIRECT	GO:0070062~extracellular exosome	38	36.5385	4.91311e-09	P54071, Q91VM9, Q922Q1, Q9CQI6, Q6P069, P47791, Q9QZQ8, Q9WUM5, P0C0S6, Q91Z53, P48758, P14152, O08709, P35550, Q8QZT1, P43274, P11352, Q8CGP6, P97372, P24527, Q91V64, P19157, Q9CS42, P97371, P04919, Q9JHI7, Q8BFR5, Q93092, P99029, Q9JM14, Q9Z0J0, Q99LX0, Q7TPR4, P51881, Q78IK2, Q8BWT1, P35282, Q9Z2I9	102	2674	19662	2.73936	8.8436e-07	4.4218e-07	6.05172e-06
GOTERM_MF_DIRECT	GO:0016491~oxidoreductase activity	19	18.2692	7.32161e-09	P54071, O08756, Q922Q1, Q8VC28, P47791, Q61425, Q5M8N4, Q91Z53, Q9JHI5, O88712, P48758, P14152, O08709, P99029, Q80XN0, P28352, P11352, Q9DCT2, P35486	100	604	17446	5.48798	2.14523e-06	2.14523e-06	9.74865e-06
GOTERM_CC_DIRECT	GO:0005743~mitochondrial inner membrane	15	14.4231	1.12613e-08	P54071, O08756, Q922Q1, Q61425, Q9WUM5, Q8BH59, Q99L43, Q8BFR5, Q8QZT1, O55125, Q80XN0, Q9DCT2, P51881, Q78IK2, Q8BWT1	102	387	19662	7.4715	2.02704e-06	6.75679e-07	1.38711e-05
GOTERM_BP_DIRECT	GO:0055114~oxidation-reduction process	19	18.2692	1.72228e-08	P54071, O08756, Q922Q1, Q8VC28, P47791, Q61425, Q5M8N4, Q91Z53, Q9JHI5, O88712, P48758, P14152, O08709, P99029, Q80XN0, P62897, P11352, Q9DCT2, P35486	98	676	18082	5.18594	1.32787e-05	1.32787e-05	2.63088e-05
GOTERM_CC_DIRECT	GO:0005634~nucleus	58	55.7692	6.19736e-08	P42225, Q9CQI6, P21619, O08573, P0C0S6, O54824, Q8BMS9, P62897, P43274, Q99M87, Q8CGP6, P19157, Q9Z2I8, Q9CWX9, Q9JHI7, Q921I9, Q6DFW4, P54726, Q9D753, P99029, O08784, Q9DCT2, P61965, O35295, Q60953, Q9DAR7, Q9CQT1, Q9JLI8, Q9QZQ8, P48758, Q8QZV7, Q8BV49, P35550, P11352, Q8BI72, P24527, Q9ESX5, Q5M8N4, Q6ZWM4, Q9Z2D6, O88712, Q9D6Z1, Q9CSU0, Q9R020, Q93092, Q99PV8, P28352, Q8K3G5, Q9WV55, Q9JM14,…	102	6019	19662	1.85751	1.11552e-05	2.78881e-06	7.63358e-05
GOTERM_MF_DIRECT	GO:0044822~poly(A) RNA binding	23	22.1154	2.08626e-07	Q9ESX5, O08756, Q9CWX9, Q9JLI8, Q6ZWM4, Q9Z2D6, Q9JHI7, Q9WUM5, Q9D6Z1, Q9R020, Q8BFR5, Q6DFW4, P35550, Q8BV49, P28352, P43274, P51881, O08784, D0QMC3, Q8BWT1, Q9D0T1, O35295, P24527	100	1113	17446	3.60519	6.11255e-05	3.05632e-05	0.000277783
GOTERM_CC_DIRECT	GO:0005730~nucleolus	19	18.2692	2.56649e-07	Q9ESX5, P42225, Q60953, Q9CQT1, Q9CWX9, Q9QZQ8, Q9JHI7, Q9D6Z1, Q921I9, Q6DFW4, P35550, Q8BV49, Q9D753, P28352, P43274, O08784, D0QMC3, Q9D0T1, Q8BI72	102	842	19662	4.3498	4.61958e-05	9.23933e-06	0.000316127
GOTERM_BP_DIRECT	GO:0006099~tricarboxylic acid cycle	6	5.76923	4.29315e-07	P54071, Q9Z2I8, Q9WUM5, Q9Z2I9, P35486, P14152	98	29	18082	38.1745	0.000330947	0.000165487	0.000655801
GOTERM_CC_DIRECT	GO:0005759~mitochondrial matrix	10	9.61538	5.40336e-07	Q9D0K2, Q8QZT1, Q80XN0, Q61425, Q99LX0, Q99M87, Q9WUM5, Q9JHI5, Q8BWT1, P35486	102	188	19662	10.2534	9.72557e-05	1.62099e-05	0.000665556
GOTERM_BP_DIRECT	GO:0008152~metabolic process	14	13.4615	1.13294e-06	P19157, Q9D0K2, Q9Z2I8, Q9WUM5, Q91Z53, Q9JHI5, O88712, O08709, Q80XN0, Q8QZT1, Q8BWT1, Q9Z2I9, P35486, Q91V64	98	463	18082	5.57914	0.000873114	0.000291123	0.00173061
GOTERM_MF_DIRECT	GO:0003824~catalytic activity	14	13.4615	3.08458e-06	Q922Q1, Q9Z2I8, Q9DAR7, Q5M8N4, Q9WUM5, P14152, O08709, Q93092, Q80XN0, Q8QZT1, Q8BWT1, Q9Z2I9, Q8R4N0, Q91V64	100	479	17446	5.09904	0.000903374	0.000301215	0.00410701
GOTERM_CC_DIRECT	GO:0031428~box C/D snoRNP complex	4	3.84615	4.53631e-06	Q6DFW4, P35550, Q9D6Z1, Q9D0T1	102	7	19662	110.151	0.000816205	0.000116641	0.00558745
GOTERM_CC_DIRECT	GO:0043209~myelin sheath	8	7.69231	6.01889e-05	P62897, P51881, Q9DCT2, Q9Z2I9, P35486, P14152, Q8BH59, Q8BFR5	102	192	19662	8.03186	0.0107759	0.00135338	0.0741124
GOTERM_MF_DIRECT	GO:0003723~RNA binding	15	14.4231	0.00012643	Q9ESX5, Q9CWX9, Q6ZWM4, Q9JLI8, Q9JHI7, Q9R020, Q921I9, Q6Q899, P35550, Q9D753, P28352, Q99LX0, Q9D0T1, Q8BI72, O35295	100	780	17446	3.355	0.0363684	0.00921879	0.168209
GOTERM_BP_DIRECT	GO:0042542~response to hydrogen peroxide	5	4.80769	0.000264431	P03958, P42225, P04919, Q99LX0, P11352	98	58	18082	15.9061	0.184459	0.0496983	0.403171
GOTERM_MF_DIRECT	GO:0051287~NAD binding	5	4.80769	0.000266507	O08756, P54071, O88712, Q91Z53, P14152	100	55	17446	15.86	0.0751252	0.015498	0.35427
GOTERM_BP_DIRECT	GO:0045454~cell redox homeostasis	5	4.80769	0.000410054	O08709, P99029, P28352, P47791, P11352	98	65	18082	14.1931	0.271098	0.0612849	0.624551
GOTERM_BP_DIRECT	GO:0006104~succinyl-CoA metabolic process	3	2.88462	0.000421282	Q9Z2I8, Q9WUM5, Q9Z2I9	98	6	18082	92.2551	0.277384	0.0527064	0.641601
GOTERM_MF_DIRECT	GO:0031490~chromatin DNA binding	5	4.80769	0.000506619	P28352, P43274, Q9Z2D6, Q9QZQ8, P0C0S6	100	65	17446	13.42	0.13798	0.0244425	0.672458
GOTERM_BP_DIRECT	GO:0006364~rRNA processing	6	5.76923	0.000585999	Q9ESX5, P35550, Q9D753, Q9CWX9, Q9JHI7, Q921I9	98	126	18082	8.7862	0.363606	0.0625225	0.891412
GOTERM_BP_DIRECT	GO:0000154~rRNA modification	3	2.88462	0.000587732	Q9ESX5, Q6DFW4, Q9D6Z1	98	7	18082	79.0758	0.364457	0.0550841	0.894038
GOTERM_BP_DIRECT	GO:0006396~RNA processing	5	4.80769	0.000638001	Q9ESX5, P35550, Q9D753, Q9JLI8, Q9JHI7	98	73	18082	12.6377	0.388632	0.0532052	0.970157
GOTERM_CC_DIRECT	GO:0005829~cytosol	21	20.1923	0.000663327	P19157, P54071, P42225, Q60953, P47791, Q6P069, Q9Z2D6, Q91Z53, P14152, Q5DU31, Q93092, O08709, P03958, Q6Q899, P99029, P62897, Q99LX0, P11352, Q99M87, Q99KK2, O88673	102	1784	19662	2.26909	0.112581	0.0131833	0.813992
GOTERM_CC_DIRECT	GO:0005737~cytoplasm	51	49.0385	0.000737924	Q91VM9, P42225, Q9CQI6, O08573, P47791, Q91Z53, Q8BMS9, O54824, Q99M87, P97372, Q91V64, P19157, P97371, Q9JHI7, Q921I9, Q6DFW4, Q9D753, P99029, O08784, Q60953, Q9DAR7, Q9CQT1, Q6P069, Q9JLI8, Q9WUM5, P48758, P14152, O08709, Q8QZV7, Q6Q899, Q8BV49, P11352, P24527, Q61425, Q9Z2D6, O88712, Q9D6Z1, Q9CSU0, Q5DU31, Q93092, P03958, Q80XN0, Q8K3G5, P28352, P18608, Q99LX0, Q9JM14, Q7TPR4, P70429, D0QMC3,…	102	6631	19662	1.48258	0.124426	0.0131996	0.90515
GOTERM_MF_DIRECT	GO:0016616~oxidoreductase activity, acting on the CH-OH group of donors, NAD or NADP as acceptor	4	3.84615	0.00078015	P54071, O88712, Q91Z53, P14152	100	32	17446	21.8075	0.204411	0.0321398	1.03379
GOTERM_BP_DIRECT	GO:0034475~U4 snRNA 3'-end processing	3	2.88462	0.000780903	Q9D753, Q9JHI7, Q921I9	98	8	18082	69.1913	0.452456	0.0584532	1.18625
GOTERM_CC_DIRECT	GO:0032040~small-subunit processome	4	3.84615	0.000830496	Q6DFW4, P35550, Q9D6Z1, Q9D0T1	102	36	19662	21.4183	0.138906	0.0135036	1.01817
GOTERM_BP_DIRECT	GO:0034427~nuclear-transcribed mRNA catabolic process, exonucleolytic, 3'-5'	3	2.88462	0.00100051	Q9D753, Q9JHI7, Q921I9	98	9	18082	61.5034	0.53781	0.067757	1.51747
GOTERM_BP_DIRECT	GO:0071028~nuclear mRNA surveillance	3	2.88462	0.00100051	Q9D753, Q9JHI7, Q921I9	98	9	18082	61.5034	0.53781	0.067757	1.51747
GOTERM_BP_DIRECT	GO:0006105~succinate metabolic process	3	2.88462	0.00124627	Q9Z2I8, Q9WUM5, Q9Z2I9	98	10	18082	55.3531	0.617671	0.0769969	1.8869
GOTERM_MF_DIRECT	GO:0051920~peroxiredoxin activity	3	2.88462	0.00139259	O08709, P99029, Q99LX0	100	10	17446	52.338	0.335229	0.0497584	1.8384
GOTERM_MF_DIRECT	GO:0019899~enzyme binding	9	8.65385	0.00153535	P42225, Q9CQI6, Q8QZT1, P04919, O08573, Q9Z0J0, Q99LX0, Q9Z2D6, Q9QZQ8	100	384	17446	4.08891	0.362501	0.048792	2.02508
GOTERM_CC_DIRECT	GO:0015030~Cajal body	4	3.84615	0.00181054	Q9ESX5, Q6DFW4, P35550, Q9JLI8	102	47	19662	16.4055	0.278334	0.0268166	2.20742
GOTERM_CC_DIRECT	GO:0000177~cytoplasmic exosome (RNase complex)	3	2.88462	0.00196403	Q9D753, Q9JHI7, Q921I9	102	13	19662	44.4842	0.298036	0.0268539	2.39249
GOTERM_MF_DIRECT	GO:1990381~ubiquitin-specific protease binding	3	2.88462	0.0020274	P54726, Q99LX0, Q9JLI8	100	12	17446	43.615	0.448234	0.0577297	2.66602
GOTERM_CC_DIRECT	GO:0000176~nuclear exosome (RNase complex)	3	2.88462	0.00228371	Q9D753, Q9JHI7, Q921I9	102	14	19662	41.3067	0.33737	0.0289678	2.77689
GOTERM_BP_DIRECT	GO:0042744~hydrogen peroxide catabolic process	3	2.88462	0.00248524	O08709, P99029, P11352	98	14	18082	39.5379	0.853173	0.137204	3.72973
GOTERM_CC_DIRECT	GO:0000178~exosome (RNase complex)	3	2.88462	0.00262625	Q9D753, Q9JHI7, Q921I9	102	15	19662	38.5529	0.377086	0.0310637	3.18723
GOTERM_CC_DIRECT	GO:0005732~small nucleolar ribonucleoprotein complex	3	2.88462	0.00337894	Q9ESX5, Q6DFW4, Q9D6Z1	102	17	19662	34.0173	0.456235	0.0373616	4.08334
GOTERM_BP_DIRECT	GO:0061136~regulation of proteasomal protein catabolic process	3	2.88462	0.00367551	P97371, P11352, P97372	98	17	18082	32.5606	0.941518	0.183549	5.46962
GOTERM_BP_DIRECT	GO:0040029~regulation of gene expression, epigenetic	3	2.88462	0.00412055	P11352, Q9Z2D6, Q9QZQ8	98	18	18082	30.7517	0.95856	0.191224	6.11258
GOTERM_MF_DIRECT	GO:0017091~AU-rich element binding	3	2.88462	0.00459685	Q9D753, Q9JHI7, Q921I9	100	18	17446	29.0767	0.740755	0.115494	5.95039
GOTERM_BP_DIRECT	GO:0006342~chromatin silencing	4	3.84615	0.00470833	Q9Z2D6, Q8CGP6, Q9QZQ8, P0C0S6	98	63	18082	11.7149	0.973713	0.203413	6.9555
GOTERM_MF_DIRECT	GO:0019003~GDP binding	4	3.84615	0.00479939	Q9CS42, Q9Z2I8, Q9WUM5, P35282	100	60	17446	11.6307	0.755761	0.11083	6.20487
GOTERM_BP_DIRECT	GO:0000302~response to reactive oxygen species	3	2.88462	0.00559683	O08709, P19157, P11352	98	21	18082	26.3586	0.986797	0.224731	8.21625
GOTERM_MF_DIRECT	GO:0004602~glutathione peroxidase activity	3	2.88462	0.00566656	O08709, P19157, P11352	100	20	17446	26.169	0.810814	0.120216	7.28726
GOTERM_CC_DIRECT	GO:0046540~U4/U6 x U5 tri-snRNP complex	3	2.88462	0.00669882	Q9JLI8, Q6ZWM4, Q9D0T1	102	24	19662	24.0956	0.701756	0.068694	7.94558
GOTERM_MF_DIRECT	GO:0003690~double-stranded DNA binding	5	4.80769	0.00751482	Q6Q899, P42225, Q8BV49, D0QMC3, O35295	100	136	17446	6.41397	0.890316	0.146038	9.55578
GOTERM_CC_DIRECT	GO:0005654~nucleoplasm	19	18.2692	0.00929949	Q9ESX5, P42225, Q60953, Q9DAR7, Q6P069, Q61425, Q9JLI8, Q9JHI7, O88712, Q9JHI5, Q9D6Z1, Q9CSU0, Q9R020, P35550, Q80XN0, P28352, P61965, P24527, Q8BI72	102	1935	19662	1.89278	0.81395	0.0891982	10.8707
GOTERM_CC_DIRECT	GO:0045244~succinate-CoA ligase complex (GDP-forming)	2	1.92308	0.0102475	Q9Z2I8, Q9WUM5	102	2	19662	192.765	0.843401	0.0929724	11.9156
GOTERM_MF_DIRECT	GO:0004776~succinate-CoA ligase (GDP-forming) activity	2	1.92308	0.0113174	Q9Z2I8, Q9WUM5	100	2	17446	174.46	0.964382	0.199347	14.0625
GOTERM_MF_DIRECT	GO:0004775~succinate-CoA ligase (ADP-forming) activity	2	1.92308	0.0113174	Q9WUM5, Q9Z2I9	100	2	17446	174.46	0.964382	0.199347	14.0625
GOTERM_MF_DIRECT	GO:0004601~peroxidase activity	3	2.88462	0.0133184	O08709, P99029, P11352	100	31	17446	16.8832	0.980327	0.217711	16.3496
GOTERM_MF_DIRECT	GO:0070491~repressing transcription factor binding	3	2.88462	0.0141542	Q99LX0, Q6P069, O88712	100	32	17446	16.3556	0.984653	0.21784	17.2883
GOTERM_MF_DIRECT	GO:0042803~protein homodimerization activity	11	10.5769	0.0150743	Q9CS42, Q9D0K2, P42225, Q60953, Q8QZT1, P04919, P47791, Q99LX0, Q7TPR4, O88712, Q91Z53	100	798	17446	2.40484	0.988326	0.219051	18.3102
GOTERM_BP_DIRECT	GO:0034473~U1 snRNA 3'-end processing	2	1.92308	0.0160081	Q9D753, Q9JHI7	98	3	18082	123.007	0.999996	0.499038	21.8477
GOTERM_BP_DIRECT	GO:0044249~cellular biosynthetic process	2	1.92308	0.0160081	Q9CS42, Q9CQT1	98	3	18082	123.007	0.999996	0.499038	21.8477
GOTERM_BP_DIRECT	GO:0034476~U5 snRNA 3'-end processing	2	1.92308	0.0160081	Q9D753, Q9JHI7	98	3	18082	123.007	0.999996	0.499038	21.8477
GOTERM_CC_DIRECT	GO:0005622~intracellular	16	15.3846	0.016351	P19157, Q60953, Q9CQI6, O08573, Q6P069, Q9CYN2, Q62293, O54824, Q8BFR5, Q99PV8, P28352, Q9Z0J0, Q7TPR4, O88673, P61965, P35282	102	1599	19662	1.92885	0.948569	0.137892	18.3777
GOTERM_CC_DIRECT	GO:0000786~nucleosome	4	3.84615	0.0182069	P43274, Q8CGP6, Q9QZQ8, P0C0S6	102	108	19662	7.13943	0.96339	0.145721	20.2545
GOTERM_BP_DIRECT	GO:0033077~T cell differentiation in thymus	3	2.88462	0.018553	Q99PV8, Q99M87, P22646	98	39	18082	14.1931	0.999999	0.532302	24.879
GOTERM_BP_DIRECT	GO:0035458~cellular response to interferon-beta	3	2.88462	0.0203896	P42225, Q8BV49, Q62293	98	41	18082	13.5007	1	0.548031	26.9979
GOTERM_CC_DIRECT	GO:0008537~proteasome activator complex	2	1.92308	0.020391	P97371, P97372	102	4	19662	96.3824	0.975481	0.155119	22.4124
GOTERM_BP_DIRECT	GO:0046952~ketone body catabolic process	2	1.92308	0.0212875	Q9D0K2, Q8QZT1	98	4	18082	92.2551	1	0.546153	28.0134
GOTERM_BP_DIRECT	GO:0048254~snoRNA localization	2	1.92308	0.0212875	Q6DFW4, P35550	98	4	18082	92.2551	1	0.546153	28.0134
GOTERM_BP_DIRECT	GO:0071042~nuclear polyadenylation-dependent mRNA catabolic process	2	1.92308	0.0212875	Q9D753, Q9JHI7	98	4	18082	92.2551	1	0.546153	28.0134
GOTERM_BP_DIRECT	GO:0019884~antigen processing and presentation of exogenous antigen	2	1.92308	0.0212875	P97371, P97372	98	4	18082	92.2551	1	0.546153	28.0134
GOTERM_MF_DIRECT	GO:0031492~nucleosomal DNA binding	3	2.88462	0.022642	P18608, Q9QZQ8, P0C0S6	100	41	17446	12.7654	0.998782	0.297547	26.2833
GOTERM_BP_DIRECT	GO:0006635~fatty acid beta-oxidation	3	2.88462	0.0232803	Q8QZT1, Q61425, Q8BWT1	98	44	18082	12.5802	1	0.56199	30.2201
GOTERM_CC_DIRECT	GO:0042645~mitochondrial nucleoid	3	2.88462	0.0233511	O08756, P51881, Q8BFR5	102	46	19662	12.5716	0.985779	0.168825	25.2513
GOTERM_BP_DIRECT	GO:0071038~nuclear polyadenylation-dependent tRNA catabolic process	2	1.92308	0.0265389	Q9D753, Q9JHI7	98	5	18082	73.8041	1	0.5941	33.6929
GOTERM_MF_DIRECT	GO:0046982~protein heterodimerization activity	8	7.69231	0.0269882	Q9Z2I8, Q9WV55, Q6P069, P22646, Q8CGP6, Q9QZQ8, Q9WUM5, P0C0S6	100	514	17446	2.71533	0.99967	0.330223	30.5306
GOTERM_MF_DIRECT	GO:0010385~double-stranded methylated DNA binding	2	1.92308	0.0280563	Q9Z2D6, Q9QZQ8	100	5	17446	69.784	0.999761	0.327698	31.5391
GOTERM_BP_DIRECT	GO:0014823~response to activity	3	2.88462	0.028446	Q9D0K2, P04919, Q61425	98	49	18082	11.2965	1	0.604291	35.6497
GOTERM_BP_DIRECT	GO:0006749~glutathione metabolic process	3	2.88462	0.028446	P19157, P47791, P11352	98	49	18082	11.2965	1	0.604291	35.6497
GOTERM_BP_DIRECT	GO:0030308~negative regulation of cell growth	4	3.84615	0.0297187	Q60953, Q9DCT2, D0QMC3, Q8BI72	98	125	18082	5.90433	1	0.605612	36.9254
GOTERM_CC_DIRECT	GO:0005777~peroxisome	4	3.84615	0.0300253	P54071, Q922Q1, P99029, Q91V64	102	131	19662	5.88595	0.995861	0.204385	31.3055
GOTERM_CC_DIRECT	GO:0000790~nuclear chromatin	5	4.80769	0.0300547	P42225, Q9Z2D6, Q8CGP6, Q9QZQ8, P0C0S6	102	228	19662	4.2273	0.995884	0.19725	31.3312
GOTERM_CC_DIRECT	GO:0001740~Barr body	2	1.92308	0.0304316	Q9QZQ8, P0C0S6	102	6	19662	64.2549	0.996162	0.192613	31.6592
GOTERM_CC_DIRECT	GO:0001652~granular component	2	1.92308	0.0304316	P35550, Q8BI72	102	6	19662	64.2549	0.996162	0.192613	31.6592
GOTERM_CC_DIRECT	GO:0070761~pre-snoRNP complex	2	1.92308	0.0304316	Q6DFW4, Q9D6Z1	102	6	19662	64.2549	0.996162	0.192613	31.6592
GOTERM_BP_DIRECT	GO:1901029~negative regulation of mitochondrial outer membrane permeabilization involved in apoptotic signaling pathway	2	1.92308	0.0317625	P51881, Q8BWT1	98	6	18082	61.5034	1	0.616019	38.9247
GOTERM_BP_DIRECT	GO:0071035~nuclear polyadenylation-dependent rRNA catabolic process	2	1.92308	0.0317625	Q9D753, Q9JHI7	98	6	18082	61.5034	1	0.616019	38.9247
GOTERM_CC_DIRECT	GO:0005694~chromosome	6	5.76923	0.0323193	P35550, P43274, Q8CGP6, Q9QZQ8, P0C0S6, Q8BMS9	102	344	19662	3.36218	0.997297	0.196695	33.2801
GOTERM_MF_DIRECT	GO:0030621~U4 snRNA binding	2	1.92308	0.0335733	Q9JLI8, Q9D0T1	100	6	17446	58.1533	0.999955	0.365434	36.5362
GOTERM_CC_DIRECT	GO:0001651~dense fibrillar component	2	1.92308	0.0354136	P35550, Q9D0T1	102	7	19662	55.0756	0.998482	0.206886	35.861
GOTERM_MF_DIRECT	GO:0001094~TFIID-class transcription factor binding	2	1.92308	0.0390593	Q6DFW4, P35550	100	7	17446	49.8457	0.999991	0.398037	41.1689
GOTERM_BP_DIRECT	GO:0008380~RNA splicing	5	4.80769	0.0408016	Q9DAR7, Q9CWX9, Q9JLI8, Q6ZWM4, Q9R020	98	241	18082	3.82801	1	0.695642	47.0774
GOTERM_BP_DIRECT	GO:0000467~exonucleolytic trimming to generate mature 3'-end of 5.8S rRNA from tricistronic rRNA transcript (SSU-rRNA, 5.8S rRNA, LSU-rRNA)	2	1.92308	0.0421264	Q9D753, Q9JHI7	98	8	18082	46.1276	1	0.694291	48.183
GOTERM_MF_DIRECT	GO:0003857~3-hydroxyacyl-CoA dehydrogenase activity	2	1.92308	0.0445145	O08756, Q61425	100	8	17446	43.615	0.999998	0.426453	45.4637
GOTERM_MF_DIRECT	GO:0008134~transcription factor binding	6	5.76923	0.0452449	Q8BV49, Q99LX0, Q9Z2D6, D0QMC3, O88712, O35295	100	342	17446	3.0607	0.999999	0.418788	46.0161
GOTERM_CC_DIRECT	GO:0000502~proteasome complex	3	2.88462	0.0453106	P54726, P97371, P97372	102	66	19662	8.76203	0.999763	0.250095	43.5126
GOTERM_BP_DIRECT	GO:0042102~positive regulation of T cell proliferation	3	2.88462	0.0463179	P04919, Q99M87, P22646	98	64	18082	8.64892	1	0.716586	51.5405
GOTERM_BP_DIRECT	GO:0042743~hydrogen peroxide metabolic process	2	1.92308	0.0472672	P62897, Q99LX0	98	9	18082	41.0023	1	0.71189	52.2721
GOTERM_BP_DIRECT	GO:0043928~exonucleolytic nuclear-transcribed mRNA catabolic process involved in deadenylation-dependent decay	2	1.92308	0.0472672	Q9D753, Q9JHI7	98	9	18082	41.0023	1	0.71189	52.2721
GOTERM_BP_DIRECT	GO:0035067~negative regulation of histone acetylation	2	1.92308	0.0472672	Q9Z2D6, O88712	98	9	18082	41.0023	1	0.71189	52.2721
GOTERM_MF_DIRECT	GO:0061133~endopeptidase activator activity	2	1.92308	0.049939	P97371, P97372	100	9	17446	38.7689	1	0.438595	49.4451
GOTERM_MF_DIRECT	GO:0003691~double-stranded telomeric DNA binding	2	1.92308	0.049939	P28352, O35295	100	9	17446	38.7689	1	0.438595	49.4451
GOTERM_MF_DIRECT	GO:0050662~coenzyme binding	2	1.92308	0.0553331	Q8QZT1, Q5M8N4	100	10	17446	34.892	1	0.460827	53.1361
GOTERM_MF_DIRECT	GO:0000979~RNA polymerase II core promoter sequence-specific DNA binding	3	2.88462	0.0555507	P42225, Q9QZQ8, P0C0S6	100	67	17446	7.81164	1	0.450127	53.2797
GOTERM_BP_DIRECT	GO:0007584~response to nutrient	3	2.88462	0.0585518	Q9D0K2, P42225, P22646	98	73	18082	7.58261	1	0.777007	60.2144
GOTERM_BP_DIRECT	GO:0031065~positive regulation of histone deacetylation	2	1.92308	0.0675585	Q60953, O88712	98	13	18082	28.3862	1	0.814617	65.6479
GOTERM_BP_DIRECT	GO:0006122~mitochondrial electron transport, ubiquinol to cytochrome c	2	1.92308	0.0675585	P62897, Q9Z2D6	98	13	18082	28.3862	1	0.814617	65.6479
GOTERM_BP_DIRECT	GO:0000956~nuclear-transcribed mRNA catabolic process	2	1.92308	0.0725641	Q9JHI7, Q921I9	98	14	18082	26.3586	1	0.827959	68.3595
GOTERM_BP_DIRECT	GO:0043069~negative regulation of programmed cell death	2	1.92308	0.0725641	Q9DAR7, Q99M87	98	14	18082	26.3586	1	0.827959	68.3595
GOTERM_MF_DIRECT	GO:0098641~cadherin binding involved in cell-cell adhesion	5	4.80769	0.0744134	O08709, P42225, Q9WV55, Q99LX0, Q9D6Z1	100	279	17446	3.12652	1	0.542178	64.2853
GOTERM_BP_DIRECT	GO:0009615~response to virus	3	2.88462	0.0748177	Q6Q899, Q9Z0J0, Q62293	98	84	18082	6.58965	1	0.828543	69.5138
GOTERM_CC_DIRECT	GO:0005913~cell-cell adherens junction	5	4.80769	0.0799727	O08709, P42225, Q9WV55, Q99LX0, Q9D6Z1	102	316	19662	3.05007	1	0.393537	64.1808
GOTERM_BP_DIRECT	GO:0032869~cellular response to insulin stimulus	3	2.88462	0.0810521	P19157, P42225, P0C0S6	98	88	18082	6.29012	1	0.844636	72.5054
GOTERM_MF_DIRECT	GO:0043295~glutathione binding	2	1.92308	0.0818519	P19157, P47791	100	15	17446	23.2613	1	0.565709	67.9235
GOTERM_MF_DIRECT	GO:0019904~protein domain specific binding	5	4.80769	0.0822373	Q9WV55, Q7TPR4, Q9Z2D6, O88712, Q5DU31	100	289	17446	3.01834	1	0.555633	68.1023
GOTERM_BP_DIRECT	GO:0008631~intrinsic apoptotic signaling pathway in response to oxidative stress	2	1.92308	0.0824958	Q60953, P11352	98	16	18082	23.0638	1	0.841806	73.1578
GOTERM_BP_DIRECT	GO:2000679~positive regulation of transcription regulatory region DNA binding	2	1.92308	0.0824958	O08573, Q99LX0	98	16	18082	23.0638	1	0.841806	73.1578
GOTERM_BP_DIRECT	GO:0042254~ribosome biogenesis	3	2.88462	0.0826353	Q9ESX5, Q6DFW4, Q9D6Z1	98	89	18082	6.21945	1	0.834249	73.2201
GOTERM_CC_DIRECT	GO:0030529~intracellular ribonucleoprotein complex	5	4.80769	0.0828616	Q9ESX5, Q6DFW4, P35550, Q6ZWM4, Q9D6Z1	102	320	19662	3.01195	1	0.394826	65.5418
GOTERM_BP_DIRECT	GO:0030307~positive regulation of cell growth	3	2.88462	0.084228	Q9JHI7, Q921I9, Q8BI72	98	90	18082	6.15034	1	0.832241	73.9216
GOTERM_BP_DIRECT	GO:0006915~apoptotic process	7	6.73077	0.086033	P42225, Q60953, P62897, Q9CWX9, Q99M87, P11352, O35295	98	570	18082	2.26591	1	0.831101	74.6958
GOTERM_BP_DIRECT	GO:0050870~positive regulation of T cell activation	2	1.92308	0.087422	P03958, P22646	98	17	18082	21.7071	1	0.828524	75.277
GOTERM_MF_DIRECT	GO:0051117~ATPase binding	3	2.88462	0.0891899	Q6DFW4, P35550, Q9D0T1	100	88	17446	5.9475	1	0.57488	71.1739
GOTERM_BP_DIRECT	GO:0006397~mRNA processing	5	4.80769	0.095041	Q9DAR7, Q9CWX9, Q9JLI8, Q6ZWM4, Q9R020	98	322	18082	2.86507	1	0.847098	78.2489
GOTERM_CC_DIRECT	GO:0031966~mitochondrial membrane	3	2.88462	0.0951911	Q9DCT2, Q91V61, Q9JHI5	102	101	19662	5.72568	1	0.430318	70.8331
GOTERM_BP_DIRECT	GO:2000045~regulation of G1/S transition of mitotic cell cycle	2	1.92308	0.0971962	P97371, P97372	98	19	18082	19.4221	1	0.846954	79.0268
GOTERM_BP_DIRECT	GO:0005975~carbohydrate metabolic process	4	3.84615	0.0990733	Q93092, P35486, P14152, Q8VDL4	98	206	18082	3.58272	1	0.845982	79.6832

## Sheet: CD8_up in Comb.Ther_GO annotati
Category	Term	Count	%	PValue	Genes	List Total	Pop Hits	Pop Total	Fold Enrichment	Bonferroni	Benjamini	FDR
GOTERM_CC_DIRECT	GO:0070062~extracellular exosome	48	52.7473	7.78917e-19	P58252, P07356, Q9CYL5, Q8BP47, P16110, P11440, P68372, P50580, Q91V92, Q05816, P16045, Q9QXS1, Q9EQK5, P20152, P24452, Q8CG48, P18181, P24547, Q9D8N0, Q62167, P09055, P18242, Q9R0P5, P20029, Q9WUA3, Q922R8, Q8BGQ7, Q99K85, Q9CZD3, Q8C1B7, P49312, P54227, B2RQC6, Q6IRU2, P62334, Q9JJU8, P99024, Q80X90, P68510, Q78PY7, Q8BTM8, P17918, P50431, Q9DCL9, P19096, Q3UW53, P10107, P62960	89	2674	19662	3.96568	1.69025e-16	1.69025e-16	9.89323e-16
GOTERM_CC_DIRECT	GO:0005913~cell-cell adherens junction	20	21.978	1.48499e-16	P58252, P07356, P20029, Q9WUA3, Q80UG5, Q91VX2, Q9WUK2, Q62523, Q8BJW6, Q9QXS1, Q80X90, Q78PY7, P24452, Q8BTM8, P19096, Q9DCL9, P10107, P09055, Q9D8N0, Q62167	89	316	19662	13.9824	2.40918e-14	1.19904e-14	1.44329e-13
GOTERM_CC_DIRECT	GO:0005737~cytoplasm	68	74.7253	4.67049e-16	P07356, Q8VDW0, P11440, P68372, P50580, Q9WUK2, Q62523, Q05816, P16045, Q61881, Q8CG48, P24452, O70251, P24547, Q9D8N0, Q62167, P46471, P97310, P04187, Q99K85, Q9Z1R2, Q8BJW6, Q8C1B7, P54227, P49312, Q9JJU8, P99024, Q80X90, P68510, Q78PY7, P17918, P50431, Q9DCL9, P19096, Q3UW53, P62960, P58252, E9PVX6, Q8BP47, P16110, P13864, Q91V92, Q9QXS1, P20152, Q9EQK5, P09055, P97855, Q9R0P5, O08663, P20029,…	89	6631	19662	2.26552	9.63674e-14	3.20854e-14	5.66214e-13
GOTERM_MF_DIRECT	GO:0098641~cadherin binding involved in cell-cell adhesion	19	20.8791	1.939e-15	P58252, P07356, P20029, Q9WUA3, Q80UG5, Q91VX2, Q9WUK2, Q8BJW6, Q9QXS1, Q80X90, Q78PY7, P24452, Q8BTM8, P19096, Q9DCL9, P10107, P09055, Q9D8N0, Q62167	88	279	17446	13.5009	4.98268e-13	4.98268e-13	2.4758e-12
GOTERM_MF_DIRECT	GO:0000166~nucleotide binding	34	37.3626	6.06145e-11	P58252, E9PVX6, Q8BP47, Q8VDW0, Q01320, P11440, P68372, Q91V92, Q9WUK2, P49717, Q61881, Q8CG48, P24547, Q62167, P97855, P46471, P97311, P97310, P20029, Q8BGD9, Q9WUA3, Q80UG5, O89086, Q8BGQ7, P25206, Q9CZD3, Q8C1B7, P49312, B2RQC6, Q9Z1Q9, P62334, P99024, Q9DCL9, P37913	88	1936	17446	3.48166	1.60022e-08	8.00112e-09	7.94188e-08
GOTERM_MF_DIRECT	GO:0044822~poly(A) RNA binding	25	27.4725	5.72115e-10	P58252, E9PVX6, P07356, Q8VDW0, P16110, Q01320, Q9WUK2, Q62523, P50580, P16045, Q9QXS1, Q62167, P97855, O08663, Q8BGD9, O89086, Q91VX2, Q9JKB3, Q91W50, P49312, Q80X90, Q78PY7, Q8BTM8, P19096, P62960	88	1113	17446	4.45305	1.51038e-07	5.03461e-08	7.496e-07
GOTERM_CC_DIRECT	GO:0042555~MCM complex	5	5.49451	4.63957e-08	P97311, P97310, P49717, Q61881, P25206	89	9	19662	122.734	1.00678e-05	2.51696e-06	5.89283e-05
GOTERM_CC_DIRECT	GO:0031012~extracellular matrix	12	13.1868	7.99115e-08	P58252, P16045, P20029, Q9WUA3, P20152, P16110, Q9QXS1, P99024, Q80X90, Q8BTM8, P68372, P18242	89	294	19662	9.0172	1.73407e-05	3.46815e-06	0.000101498
GOTERM_CC_DIRECT	GO:0005634~nucleus	52	57.1429	9.48354e-08	Q80SU7, P07356, P11032, Q8VDW0, P11440, P68372, P50580, Q62523, P16045, P49717, Q61881, Q8CG48, P24452, P24547, Q62167, Q9D8N0, P46471, P97311, P97310, Q9Z1R2, P49312, P99024, Q78PY7, P97825, P17918, P50431, P37913, P62960, P58252, E9PVX6, P16110, Q01320, P13864, Q8VEE4, Q9EQK5, P97855, P20029, Q9WUA3, O89086, Q9QUR6, Q9JKB3, P25206, Q8C156, B2RQC6, P70677, Q80ZV0, Q99MD9, P83940, P62334, Q8BTM8,…	89	6019	19662	1.90861	2.05791e-05	3.42987e-06	0.000120453
GOTERM_BP_DIRECT	GO:0006268~DNA unwinding involved in DNA replication	5	5.49451	9.79901e-08	P97311, P97310, P49717, Q01320, Q61881	87	10	18082	103.92	6.44754e-05	6.44754e-05	0.000146551
GOTERM_BP_DIRECT	GO:0006260~DNA replication	9	9.89011	1.24113e-07	P97311, P97310, P49717, Q99MD9, Q61881, P17918, Q8VEE4, P25206, P37913	87	123	18082	15.2077	8.16628e-05	4.08323e-05	0.000185619
GOTERM_MF_DIRECT	GO:0003697~single-stranded DNA binding	8	8.79121	1.83363e-07	P49312, P97311, P49717, Q61881, Q8VEE4, Q9JKB3, P10107, P62960	88	83	17446	19.1084	4.84067e-05	1.21019e-05	0.000240247
GOTERM_MF_DIRECT	GO:0004386~helicase activity	9	9.89011	2.57234e-07	P97311, P97310, P49717, Q8VDW0, Q61881, P25206, P10107, Q62167, P97855	88	129	17446	13.8314	6.79075e-05	1.35819e-05	0.000337035
GOTERM_CC_DIRECT	GO:0042470~melanosome	8	8.79121	3.45381e-07	P07356, P20029, Q922R8, Q78PY7, P24452, P19096, P09055, P18242	89	101	19662	17.4987	7.4945e-05	1.07068e-05	0.000438677
GOTERM_BP_DIRECT	GO:0030261~chromosome condensation	5	5.49451	8.3094e-07	Q01320, P11440, Q8CG48, Q8K2Z4, Q8C156	87	16	18082	64.9497	0.00054661	0.000182236	0.00124272
GOTERM_MF_DIRECT	GO:0005524~ATP binding	24	26.3736	8.34662e-07	P97311, E9PVX6, P97310, P20029, Q8BP47, Q9WUA3, Q8VDW0, Q01320, P11440, Q8BGQ7, Q91V92, P25206, Q9CZD3, B2RQC6, P49717, Q9Z1Q9, P62334, Q61881, Q8CG48, Q9DCL9, Q62167, P37913, P46471, P97855	88	1507	17446	3.15727	0.000220327	3.67245e-05	0.00109359
GOTERM_CC_DIRECT	GO:0000784~nuclear chromosome, telomeric region	8	8.79121	1.63373e-06	P97311, P97310, P49717, Q61881, P11440, P17918, Q8VEE4, P25206	89	127	19662	13.9163	0.000354456	4.43139e-05	0.00207502
GOTERM_MF_DIRECT	GO:0003678~DNA helicase activity	5	5.49451	1.67351e-06	P97311, P97310, P49717, Q61881, P25206	88	18	17446	55.0694	0.000441711	6.31135e-05	0.00219266
GOTERM_CC_DIRECT	GO:0005829~cytosol	24	26.3736	2.44146e-06	P01872, Q80SU7, P58252, P07356, Q9WUA3, P04187, Q8BGQ7, Q91V92, Q6P1F6, Q9QUR6, Q9Z1R2, P54227, B2RQC6, P70677, P16045, P20152, P68510, Q61881, P99024, Q8BTM8, P50431, Q9DCL9, P10107, P97855	89	1784	19662	2.97204	0.000529657	5.88646e-05	0.00310092
GOTERM_BP_DIRECT	GO:0098609~cell-cell adhesion	9	9.89011	3.24977e-06	Q9WUA3, Q9QXS1, Q80X90, Q78PY7, P24452, Q91VX2, Q9WUK2, Q9DCL9, Q9D8N0	87	189	18082	9.8971	0.00213607	0.000534445	0.00486014
GOTERM_BP_DIRECT	GO:0006270~DNA replication initiation	5	5.49451	4.71258e-06	P97311, P97310, P49717, Q61881, P25206	87	24	18082	43.2998	0.00309608	0.000619985	0.00704775
GOTERM_BP_DIRECT	GO:0007049~cell cycle	14	15.3846	6.28152e-06	P97311, E9PVX6, P97310, Q80UG5, P11440, P25206, Q8C156, Q8C1B7, P49717, Q99MD9, Q61881, Q8CG48, Q8K2Z4, P37913	87	614	18082	4.739	0.00412472	0.000688638	0.00939403
GOTERM_CC_DIRECT	GO:0000793~condensed chromosome	5	5.49451	9.39191e-06	E9PVX6, Q01320, Q8CG48, Q8VEE4, Q8K2Z4	89	30	19662	36.8202	0.00203598	0.000203785	0.0119283
GOTERM_CC_DIRECT	GO:0001725~stress fiber	6	6.59341	1.24283e-05	Q8C1B7, P07356, Q6IRU2, Q80X90, Q80UG5, Q62523	89	67	19662	19.784	0.00269333	0.000245148	0.0157844
GOTERM_BP_DIRECT	GO:0006412~translation	11	12.0879	2.03052e-05	Q9CZD3, P58252, Q8BGD9, Q8BP47, Q9Z1Q9, O89086, O70251, Q9WUK2, Q8BGQ7, Q8BJW6, Q9D8N0	87	401	18082	5.70132	0.0132721	0.00190689	0.0303635
GOTERM_MF_DIRECT	GO:0001948~glycoprotein binding	6	6.59341	4.63033e-05	P06332, P16045, P20029, P20152, Q8BTM8, P09055	88	79	17446	15.057	0.0121499	0.00152688	0.0606508
GOTERM_CC_DIRECT	GO:0005925~focal adhesion	10	10.989	6.34423e-05	Q6IRU2, P20029, P20152, Q9QXS1, Q80X90, Q8BTM8, Q62523, P10107, P09055, P97855	89	391	19662	5.65016	0.0136731	0.00114663	0.0805499
GOTERM_CC_DIRECT	GO:0005654~nucleoplasm	22	24.1758	9.75558e-05	P97311, P97310, Q01320, P11440, P13864, O89086, P50580, Q91V92, Q8VEE4, Q9Z1R2, P25206, Q9CZD3, P49312, B2RQC6, P49717, Q99MD9, Q61881, P24452, P17918, Q8K2Z4, P10107, P37913	89	1935	19662	2.51177	0.0209481	0.00162719	0.123837
GOTERM_MF_DIRECT	GO:0003723~RNA binding	14	15.3846	0.000123789	P49312, P58252, Q8BGD9, P13864, O89086, P50580, Q8BGQ7, Q9WUK2, P24547, Q9JKB3, Q91W50, Q62167, P97855, P62960	88	780	17446	3.55833	0.032154	0.00362478	0.16207
GOTERM_MF_DIRECT	GO:0016787~hydrolase activity	20	21.978	0.000161654	P97311, P97310, O08663, P11032, P04187, Q8VDW0, Q9QUR6, P25206, Q9CZD3, B2RQC6, P70677, P49717, O35205, P62334, Q61881, P19096, Q62167, P46471, P18242, P97855	88	1533	17446	2.58643	0.0417822	0.00425892	0.211597
GOTERM_MF_DIRECT	GO:0004003~ATP-dependent DNA helicase activity	4	4.3956	0.000172243	P97311, P49717, Q61881, Q62167	88	22	17446	36.0455	0.0444574	0.00412565	0.225442
GOTERM_CC_DIRECT	GO:0000796~condensin complex	3	3.2967	0.00019632	Q8CG48, Q8K2Z4, Q8C156	89	5	19662	132.553	0.0417108	0.00303863	0.249065
GOTERM_BP_DIRECT	GO:0071353~cellular response to interleukin-4	4	4.3956	0.000279758	P97310, P20029, P19096, P24547	87	27	18082	30.791	0.168153	0.0227505	0.417581
GOTERM_BP_DIRECT	GO:0043066~negative regulation of apoptotic process	11	12.0879	0.0003488	P70677, P20029, P16110, P68510, P11440, Q8BTM8, P50580, Q9Z1R2, Q9JKB3, Q62167, P62960	87	566	18082	4.03928	0.205109	0.0251831	0.520387
GOTERM_MF_DIRECT	GO:0005515~protein binding	36	39.5604	0.000357495	P58252, P01872, P07356, P16110, P13864, P11440, Q62523, P16045, P49717, Q9QXS1, P20152, Q61881, P18181, O70251, P09055, P46471, P97855, P97311, O08663, P20029, P04187, Q8BGQ7, Q9Z1R2, Q9JKB3, Q9CZD3, Q8C1B7, P54227, P83940, Q99MD9, Q80X90, P68510, Q78PY7, Q8BTM8, P17918, P10107, P62960	88	4092	17446	1.74413	0.0900772	0.00783543	0.467387
GOTERM_CC_DIRECT	GO:0005844~polysome	4	4.3956	0.000939304	P58252, Q8BGD9, Q9WUK2, Q9JKB3	89	43	19662	20.5508	0.184476	0.013503	1.1865
GOTERM_MF_DIRECT	GO:0004812~aminoacyl-tRNA ligase activity	4	4.3956	0.000961499	Q9CZD3, Q8BP47, Q9Z1Q9, Q8BGQ7	88	39	17446	20.3333	0.224275	0.0193456	1.25248
GOTERM_CC_DIRECT	GO:0048471~perinuclear region of cytoplasm	11	12.0879	0.00104014	P01872, P07356, P20152, Q9QXS1, Q9EQK5, Q80UG5, Q8BTM8, Q9WUK2, P25206, P09055, P62960	89	692	19662	3.51176	0.202145	0.0140151	1.3131
GOTERM_CC_DIRECT	GO:0045121~membrane raft	7	7.69231	0.00115038	P58252, P70677, P06332, P07356, P18181, P09055, P18242	89	262	19662	5.90248	0.221024	0.0145852	1.45133
GOTERM_MF_DIRECT	GO:0003779~actin binding	8	8.79121	0.00149378	Q6IRU2, Q9QXS1, P68510, Q80X90, P24452, Q8BTM8, P09055, Q9R0P5	88	338	17446	4.69231	0.326086	0.0277958	1.93959
GOTERM_BP_DIRECT	GO:0007076~mitotic chromosome condensation	3	3.2967	0.00168558	Q8CG48, Q8K2Z4, Q8C156	87	13	18082	47.9629	0.670457	0.105065	2.49146
GOTERM_MF_DIRECT	GO:0043024~ribosomal small subunit binding	3	3.2967	0.00185025	Q8BGD9, Q9WUK2, Q62167	88	13	17446	45.75	0.38671	0.032069	2.39729
GOTERM_MF_DIRECT	GO:0032403~protein complex binding	8	8.79121	0.00206979	P70677, Q9WUA3, P83940, P99024, P24452, Q8BTM8, Q6P1F6, P09055	88	358	17446	4.43017	0.421311	0.0336091	2.67818
GOTERM_BP_DIRECT	GO:0006413~translational initiation	4	4.3956	0.00216281	Q8BGD9, Q9WUK2, Q62167, Q8BJW6	87	54	18082	15.3955	0.759412	0.121479	3.18627
GOTERM_BP_DIRECT	GO:0045727~positive regulation of translation	4	4.3956	0.00252535	P58252, O89086, Q3UW53, Q62167	87	57	18082	14.5852	0.810579	0.129466	3.71101
GOTERM_BP_DIRECT	GO:0006417~regulation of translation	5	5.49451	0.00265519	O89086, Q3UW53, P50580, Q62167, Q8BJW6	87	121	18082	8.58839	0.826128	0.12591	3.89828
GOTERM_MF_DIRECT	GO:0003824~catalytic activity	9	9.89011	0.0026717	B2RQC6, Q9WUA3, P13864, P50431, Q91V92, Q9DCL9, P19096, P24547, Q99K85	88	479	17446	3.72495	0.50652	0.0406943	3.4445
GOTERM_MF_DIRECT	GO:0043022~ribosome binding	4	4.3956	0.00274389	P58252, P20029, Q9Z1R2, Q8BJW6	88	56	17446	14.1607	0.51586	0.0394978	3.53602
GOTERM_CC_DIRECT	GO:0005856~cytoskeleton	13	14.2857	0.00391594	Q8C1B7, P54227, Q6IRU2, Q9QXS1, P20152, Q9EQK5, Q80X90, P99024, Q80UG5, P11440, P68372, Q8BTM8, Q62523	89	1113	19662	2.58039	0.573195	0.0462002	4.86137
GOTERM_BP_DIRECT	GO:0034976~response to endoplasmic reticulum stress	4	4.3956	0.00568708	P58252, P20029, Q922R8, Q3UW53	87	76	18082	10.9389	0.976547	0.235135	8.17604
GOTERM_MF_DIRECT	GO:0005200~structural constituent of cytoskeleton	4	4.3956	0.00696142	P20152, Q9QXS1, P99024, P68372	88	78	17446	10.1667	0.841855	0.0925032	8.74654
GOTERM_CC_DIRECT	GO:0043234~protein complex	9	9.89011	0.00708243	B2RQC6, P07356, Q99MD9, P99024, Q01320, P13864, Q8BTM8, P18181, P10107	89	628	19662	3.16607	0.786123	0.0779691	8.63209
GOTERM_MF_DIRECT	GO:0043236~laminin binding	3	3.2967	0.00739202	P16045, P16110, P09055	88	26	17446	22.875	0.858964	0.0932941	9.26364
GOTERM_MF_DIRECT	GO:0003746~translation elongation factor activity	3	3.2967	0.00795768	P58252, O70251, Q9D8N0	88	27	17446	22.0278	0.878669	0.0955602	9.9388
GOTERM_MF_DIRECT	GO:0003676~nucleic acid binding	14	15.3846	0.00809971	P49312, Q8BGD9, Q8BP47, Q8VDW0, Q78PY7, O89086, Q8BGQ7, Q9WUK2, Q8VEE4, Q9JKB3, Q91W50, Q62167, P97855, P62960	88	1237	17446	2.24373	0.88317	0.0929814	10.1076
GOTERM_BP_DIRECT	GO:0051301~cell division	7	7.69231	0.00882953	Q8C1B7, Q80UG5, P11440, Q8CG48, Q8K2Z4, P37913, Q8C156	87	374	18082	3.89004	0.997078	0.322294	12.4218
GOTERM_MF_DIRECT	GO:0003677~DNA binding	18	19.7802	0.00906108	P97311, E9PVX6, P97310, Q01320, P13864, P50580, Q8VEE4, Q9JKB3, Q91W50, P25206, P49717, Q61881, P17918, P24547, Q62167, P37913, P62960, P97855	88	1847	17446	1.93205	0.909556	0.0992067	11.2425
GOTERM_MF_DIRECT	GO:0016874~ligase activity	7	7.69231	0.00945496	Q9CZD3, B2RQC6, Q8BP47, Q9Z1Q9, Q9DCL9, Q8BGQ7, P37913	88	362	17446	3.83356	0.918568	0.0992246	11.7036
GOTERM_BP_DIRECT	GO:0097010~eukaryotic translation initiation factor 4F complex assembly	2	2.1978	0.00948986	Q8BGD9, Q9WUK2	87	2	18082	207.839	0.998116	0.324387	13.2904
GOTERM_MF_DIRECT	GO:0016597~amino acid binding	3	3.2967	0.0097672	B2RQC6, P50431, Q8BGQ7	88	30	17446	19.825	0.925071	0.098458	12.0676
GOTERM_MF_DIRECT	GO:0034057~RNA strand-exchange activity	2	2.1978	0.00994905	Q8BGD9, Q9WUK2	88	2	17446	198.25	0.928617	0.0965432	12.2789
GOTERM_CC_DIRECT	GO:0010494~cytoplasmic stress granule	3	3.2967	0.0119152	Q62167, P97855, P62960	89	37	19662	17.9125	0.925809	0.121954	14.1223
GOTERM_MF_DIRECT	GO:0019899~enzyme binding	7	7.69231	0.0123884	P06332, P97310, B2RQC6, P20029, Q01320, P68510, P17918	88	384	17446	3.61393	0.962782	0.114752	15.0689
GOTERM_CC_DIRECT	GO:0016020~membrane	43	47.2527	0.012614	P58252, P01872, E9PVX6, P06332, P07356, Q9CYL5, P16110, Q8VDW0, P11440, P50580, Q91V92, Q9WUK2, P49717, Q9EQK5, Q61881, P18181, P24547, Q62167, P09055, Q9D8N0, P97855, P46471, P20029, Q9WUA3, Q922R8, Q9ESE1, Q8BGQ7, Q9QUR6, Q9Z1R2, P25206, Q8C156, P49312, P54227, B2RQC6, Q6IRU2, P62334, Q78PY7, Q8BTM8, Q9DCL9, Q3UW53, P19096, Q8K2Z4, P10107	89	6998	19662	1.35748	0.936369	0.122935	14.8906
GOTERM_MF_DIRECT	GO:0042802~identical protein binding	9	9.89011	0.0126778	P97311, P01872, B2RQC6, P20152, Q80X90, P17918, P50431, Q9DCL9, P19096	88	625	17446	2.8548	0.965553	0.113343	15.3944
GOTERM_BP_DIRECT	GO:0006418~tRNA aminoacylation for protein translation	3	3.2967	0.0126838	Q9CZD3, Q8BP47, Q9Z1Q9	87	36	18082	17.3199	0.999775	0.389866	17.3791
GOTERM_CC_DIRECT	GO:0030529~intracellular ribonucleoprotein complex	6	6.59341	0.014458	P49312, P58252, Q9EQK5, P50580, Q9JKB3, P62960	89	320	19662	4.14228	0.957587	0.133809	16.8876
GOTERM_MF_DIRECT	GO:0019904~protein domain specific binding	6	6.59341	0.0147806	P20029, P99024, P68510, P24452, P13864, P09055	88	289	17446	4.11592	0.98038	0.126772	17.7252
GOTERM_MF_DIRECT	GO:0034988~Fc-gamma receptor I complex binding	2	2.1978	0.0148868	P16110, Q8BTM8	88	3	17446	132.167	0.980931	0.123649	17.8413
GOTERM_BP_DIRECT	GO:0006974~cellular response to DNA damage stimulus	7	7.69231	0.0149827	P70677, Q8VDW0, Q01320, Q61881, P17918, Q8VEE4, P37913	87	420	18082	3.46398	0.999951	0.424113	20.21
GOTERM_CC_DIRECT	GO:0042383~sarcolemma	4	4.3956	0.0159786	P07356, Q9QXS1, P10107, P09055	89	118	19662	7.48886	0.969662	0.140988	18.5017
GOTERM_BP_DIRECT	GO:0001649~osteoblast differentiation	4	4.3956	0.0167098	Q6IRU2, Q78PY7, P19096, P46471	87	113	18082	7.35714	0.999985	0.4421	22.2769
GOTERM_CC_DIRECT	GO:0045298~tubulin complex	2	2.1978	0.0177841	P99024, P68372	89	4	19662	110.461	0.979634	0.149767	20.3806
GOTERM_BP_DIRECT	GO:0071466~cellular response to xenobiotic stimulus	2	2.1978	0.0188907	Q61881, P17918	87	4	18082	103.92	0.999996	0.466048	24.8156
GOTERM_BP_DIRECT	GO:0045185~maintenance of protein location	2	2.1978	0.0188907	P16045, P16110	87	4	18082	103.92	0.999996	0.466048	24.8156
GOTERM_MF_DIRECT	GO:0019834~phospholipase A2 inhibitor activity	2	2.1978	0.0198002	P07356, P10107	88	4	17446	99.125	0.994906	0.156599	23.0513
GOTERM_MF_DIRECT	GO:0033592~RNA strand annealing activity	2	2.1978	0.0198002	Q8BGD9, Q9WUK2	88	4	17446	99.125	0.994906	0.156599	23.0513
GOTERM_BP_DIRECT	GO:0008283~cell proliferation	5	5.49451	0.020858	E9PVX6, Q9EQK5, Q99MD9, Q61881, P11440	87	220	18082	4.72362	0.999999	0.483389	27.039
GOTERM_BP_DIRECT	GO:0030163~protein catabolic process	3	3.2967	0.0210435	P62334, P46471, P18242	87	47	18082	13.2663	0.999999	0.470651	27.2454
GOTERM_BP_DIRECT	GO:0006414~translational elongation	3	3.2967	0.0210435	P58252, O70251, Q9D8N0	87	47	18082	13.2663	0.999999	0.470651	27.2454
GOTERM_MF_DIRECT	GO:0004252~serine-type endopeptidase activity	5	5.49451	0.0215631	P70677, P11032, O35205, P04187, Q9QUR6	88	212	17446	4.67571	0.996833	0.164598	24.8449
GOTERM_BP_DIRECT	GO:0043065~positive regulation of apoptotic process	6	6.59341	0.0217922	P70677, P11032, Q01320, P10107, P09055, Q62167	87	335	18082	3.72249	0.999999	0.46759	28.0732
GOTERM_CC_DIRECT	GO:0016281~eukaryotic translation initiation factor 4F complex	2	2.1978	0.022181	Q8BGD9, Q9WUK2	89	5	19662	88.3685	0.992307	0.176917	24.7909
GOTERM_CC_DIRECT	GO:0009986~cell surface	8	8.79121	0.0226417	P01872, P06332, P07356, P16045, P20029, P16110, P10107, P09055	89	629	19662	2.80981	0.993055	0.173986	25.2398
GOTERM_CC_DIRECT	GO:0000228~nuclear chromosome	3	3.2967	0.0235434	Q01320, Q8CG48, Q8K2Z4	89	53	19662	12.505	0.994316	0.174266	26.1111
GOTERM_BP_DIRECT	GO:0010032~meiotic chromosome condensation	2	2.1978	0.023558	Q8CG48, Q8K2Z4	87	5	18082	83.1356	1	0.479836	29.9907
GOTERM_CC_DIRECT	GO:0070937~CRD-mediated mRNA stability complex	2	2.1978	0.0265585	Q91W50, P62960	89	6	19662	73.6404	0.997094	0.188289	28.9571
GOTERM_MF_DIRECT	GO:0003682~chromatin binding	7	7.69231	0.0289336	Q01320, P11440, P13864, P17918, Q8VEE4, Q8K2Z4, P62960	88	466	17446	2.978	0.99957	0.209337	31.9337
GOTERM_BP_DIRECT	GO:0031100~organ regeneration	3	3.2967	0.0291674	E9PVX6, B2RQC6, P11440	87	56	18082	11.1342	1	0.541184	35.7705
GOTERM_MF_DIRECT	GO:0004859~phospholipase inhibitor activity	2	2.1978	0.0295545	P07356, P10107	88	6	17446	66.0833	0.999637	0.2078	32.5018
GOTERM_MF_DIRECT	GO:0036402~proteasome-activating ATPase activity	2	2.1978	0.0295545	P62334, P46471	88	6	17446	66.0833	0.999637	0.2078	32.5018
GOTERM_BP_DIRECT	GO:0042542~response to hydrogen peroxide	3	3.2967	0.0311177	P58252, P70677, P37913	87	58	18082	10.7503	1	0.550685	37.6734
GOTERM_BP_DIRECT	GO:0006084~acetyl-CoA metabolic process	2	2.1978	0.0328269	Q91V92, P19096	87	7	18082	59.3826	1	0.556664	39.2976
GOTERM_BP_DIRECT	GO:1903608~protein localization to cytoplasmic stress granule	2	2.1978	0.0328269	Q62167, P62960	87	7	18082	59.3826	1	0.556664	39.2976
GOTERM_CC_DIRECT	GO:0031595~nuclear proteasome complex	2	2.1978	0.0352554	P62334, P46471	89	8	19662	55.2303	0.999586	0.235528	36.6105
GOTERM_BP_DIRECT	GO:0010977~negative regulation of neuron projection development	3	3.2967	0.0372658	P16045, P20152, Q8BTM8	87	64	18082	9.74246	1	0.590362	43.3334
GOTERM_CC_DIRECT	GO:0030056~hemidesmosome	2	2.1978	0.039575	Q9QXS1, P09055	89	9	19662	49.0936	0.999843	0.253289	40.1225
GOTERM_BP_DIRECT	GO:0014075~response to amine	2	2.1978	0.0420087	B2RQC6, P11440	87	9	18082	46.1865	1	0.622341	47.3681
GOTERM_BP_DIRECT	GO:0031340~positive regulation of vesicle fusion	2	2.1978	0.0420087	P07356, P10107	87	9	18082	46.1865	1	0.622341	47.3681
GOTERM_MF_DIRECT	GO:0005525~GTP binding	6	6.59341	0.0425706	P58252, Q80SU7, Q8C1B7, P99024, Q80UG5, P68372	88	383	17446	3.10574	0.99999	0.279737	43.447
GOTERM_CC_DIRECT	GO:0031597~cytosolic proteasome complex	2	2.1978	0.0438755	P62334, P46471	89	10	19662	44.1843	0.999941	0.269532	43.4401
GOTERM_MF_DIRECT	GO:0008233~peptidase activity	7	7.69231	0.0440619	P70677, O08663, P11032, O35205, P04187, Q9QUR6, P18242	88	516	17446	2.68944	0.999993	0.281404	44.5903
GOTERM_MF_DIRECT	GO:0003743~translation initiation factor activity	3	3.2967	0.0452969	Q8BGD9, Q9WUK2, Q8BJW6	88	68	17446	8.74632	0.999995	0.281614	45.521
GOTERM_MF_DIRECT	GO:0042803~protein homodimerization activity	9	9.89011	0.0453831	P06332, P16045, Q9CYL5, P11032, Q01320, Q8BTM8, P50431, P19096, P10107	88	798	17446	2.2359	0.999995	0.275788	45.5854
GOTERM_CC_DIRECT	GO:0005903~brush border	3	3.2967	0.046676	Q9QXS1, Q80X90, Q8BTM8	89	77	19662	8.60733	0.999969	0.276856	45.5086
GOTERM_MF_DIRECT	GO:0008236~serine-type peptidase activity	4	4.3956	0.0480352	P11032, O35205, P04187, Q9QUR6	88	163	17446	4.86503	0.999998	0.283395	47.5331
GOTERM_BP_DIRECT	GO:0051289~protein homotetramerization	3	3.2967	0.0484387	Q9WUA3, P50431, P24547	87	74	18082	8.42591	1	0.663453	52.411
GOTERM_CC_DIRECT	GO:0034663~endoplasmic reticulum chaperone complex	2	2.1978	0.0524194	P20029, Q922R8	89	12	19662	36.8202	0.999992	0.298168	49.5344
GOTERM_MF_DIRECT	GO:0002161~aminoacyl-tRNA editing activity	2	2.1978	0.0535224	Q9Z1Q9, Q8BGQ7	88	11	17446	36.0455	1	0.30445	51.3603
GOTERM_CC_DIRECT	GO:0009897~external side of plasma membrane	5	5.49451	0.0539759	P01872, P06332, P16110, P18181, P09055	89	317	19662	3.48456	0.999994	0.298223	50.5772
GOTERM_BP_DIRECT	GO:0006915~apoptotic process	7	7.69231	0.0542129	P70677, P16045, P11032, P04187, P11440, Q9Z1R2, Q62167	87	570	18082	2.55241	1	0.693666	56.5517
GOTERM_BP_DIRECT	GO:0001701~in utero embryonic development	5	5.49451	0.0542896	Q80ZV0, Q8VEE4, Q9JKB3, P09055, P62960	87	299	18082	3.47557	1	0.682658	56.6043
GOTERM_BP_DIRECT	GO:0045899~positive regulation of RNA polymerase II transcriptional preinitiation complex assembly	2	2.1978	0.0556203	P62334, P46471	87	12	18082	34.6398	1	0.680523	57.5086
GOTERM_CC_DIRECT	GO:0008540~proteasome regulatory particle, base subcomplex	2	2.1978	0.056663	P62334, P46471	89	13	19662	33.9879	0.999997	0.303479	52.3309
GOTERM_BP_DIRECT	GO:0006508~proteolysis	7	7.69231	0.0588093	P70677, O08663, P11032, O35205, P04187, Q9QUR6, P18242	87	582	18082	2.49978	1	0.690554	59.6047
GOTERM_BP_DIRECT	GO:0009615~response to virus	3	3.2967	0.0606587	P54227, Q62167, Q9D8N0	87	84	18082	7.42282	1	0.691624	60.7757
GOTERM_MF_DIRECT	GO:0051787~misfolded protein binding	2	2.1978	0.0629449	P20029, Q9Z1R2	88	13	17446	30.5	1	0.342047	57.3363
GOTERM_BP_DIRECT	GO:0016485~protein processing	3	3.2967	0.0632177	P70677, O08663, P04187	87	86	18082	7.2502	1	0.696878	62.3438
GOTERM_BP_DIRECT	GO:0043149~stress fiber assembly	2	2.1978	0.0690406	Q62523, P09055	87	15	18082	27.7119	1	0.719798	65.6965
GOTERM_BP_DIRECT	GO:0008152~metabolic process	6	6.59341	0.0697247	B2RQC6, Q9WUA3, P13864, Q91V92, Q9DCL9, P19096	87	463	18082	2.69338	1	0.713923	66.0716
GOTERM_CC_DIRECT	GO:0022624~proteasome accessory complex	2	2.1978	0.0734504	P62334, P46471	89	17	19662	25.9907	1	0.368619	62.0519
GOTERM_BP_DIRECT	GO:0006401~RNA catabolic process	2	2.1978	0.073472	Q80ZV0, Q78PY7	87	16	18082	25.9799	1	0.724041	68.0591
GOTERM_BP_DIRECT	GO:0021680~cerebellar Purkinje cell layer development	2	2.1978	0.073472	P20029, Q8BGQ7	87	16	18082	25.9799	1	0.724041	68.0591
GOTERM_MF_DIRECT	GO:0019900~kinase binding	3	3.2967	0.0771602	P20152, Q8BTM8, P09055	88	92	17446	6.46467	1	0.396338	65.0799
GOTERM_BP_DIRECT	GO:0042493~response to drug	5	5.49451	0.0782204	P16045, Q61881, P11440, P13864, P10107	87	339	18082	3.06547	1	0.738112	70.4216
GOTERM_MF_DIRECT	GO:0016887~ATPase activity	4	4.3956	0.0782884	P20029, Q8VDW0, Q62167, P46471	88	200	17446	3.965	1	0.39378	65.6351
GOTERM_MF_DIRECT	GO:0042277~peptide binding	3	3.2967	0.0786086	Q9QUR6, P09055, P18242	88	93	17446	6.39516	1	0.388122	65.7912
GOTERM_CC_DIRECT	GO:0005788~endoplasmic reticulum lumen	3	3.2967	0.0791478	P06332, P20029, Q922R8	89	104	19662	6.37273	1	0.383435	64.9113
GOTERM_BP_DIRECT	GO:0006298~mismatch repair	2	2.1978	0.0822724	P17918, Q8VEE4	87	18	18082	23.0932	1	0.747883	72.3077
GOTERM_CC_DIRECT	GO:0005730~nucleolus	8	8.79121	0.0830117	E9PVX6, Q01320, P97825, P24452, Q8CG48, O89086, Q8BTM8, P50580	89	842	19662	2.09902	1	0.390355	66.7362
GOTERM_BP_DIRECT	GO:0050731~positive regulation of peptidyl-tyrosine phosphorylation	3	3.2967	0.0835023	P01872, P06332, P09055	87	101	18082	6.17344	1	0.744892	72.8576
GOTERM_BP_DIRECT	GO:0032355~response to estradiol	3	3.2967	0.0835023	P58252, P06332, P10107	87	101	18082	6.17344	1	0.744892	72.8576
GOTERM_CC_DIRECT	GO:0005657~replication fork	2	2.1978	0.0858468	P13864, P17918	89	20	19662	22.0921	1	0.393116	68.019
GOTERM_BP_DIRECT	GO:0045022~early endosome to late endosome transport	2	2.1978	0.0866416	P01872, Q8BTM8	87	19	18082	21.8778	1	0.750127	74.2153
GOTERM_MF_DIRECT	GO:0003924~GTPase activity	4	4.3956	0.0866593	P58252, P99024, P68372, Q62167	88	209	17446	3.79426	1	0.412449	69.507
GOTERM_MF_DIRECT	GO:0003823~antigen binding	3	3.2967	0.0904946	P01872, P06330, P18181	88	101	17446	5.88861	1	0.4198	71.1427
GOTERM_BP_DIRECT	GO:0006259~DNA metabolic process	2	2.1978	0.0909902	E9PVX6, Q01320	87	20	18082	20.7839	1	0.759889	75.9915
GOTERM_BP_DIRECT	GO:0007088~regulation of mitotic nuclear division	2	2.1978	0.0909902	E9PVX6, P68510	87	20	18082	20.7839	1	0.759889	75.9915
GOTERM_BP_DIRECT	GO:0006164~purine nucleotide biosynthetic process	2	2.1978	0.0909902	Q9DCL9, P24547	87	20	18082	20.7839	1	0.759889	75.9915
GOTERM_MF_DIRECT	GO:0008134~transcription factor binding	5	5.49451	0.0915862	Q8BTM8, P17918, Q62167, P46471, P62960	88	342	17446	2.89839	1	0.416986	71.5932
GOTERM_CC_DIRECT	GO:0042995~cell projection	7	7.69231	0.0996207	Q9CZD3, Q8C1B7, B2RQC6, P20152, O89086, P10107, P09055	89	712	19662	2.17198	1	0.434076	73.6278
GOTERM_MF_DIRECT	GO:0017025~TBP-class protein binding	2	2.1978	0.0997165	P62334, P46471	88	21	17446	18.881	1	0.438841	74.7498
